1       **Cell cycle-controlled clearance of the CcrM DNA methyltransferase by Lon is**  
2       **dependent on DNA-facilitated proteolysis and substrate polar sequestration**

3

4                                   Xiaofeng Zhou<sup>1</sup> and Lucy Shapiro<sup>1,2,\*</sup>

5

6       <sup>1</sup>Department of Developmental Biology, Stanford University School of Medicine,  
7       Stanford, CA

8       <sup>2</sup>Chan Zuckerberg Biohub, San Francisco, CA 94158

9       \*Correspondence: [shapiro@stanford.edu](mailto:shapiro@stanford.edu)

10

11       Key words: Lon protease, DNA adaptor, DNA methyltransferase, protein sequestration,  
12       protein degradation

13

## 14 **Abstract**

15 N6-adenine methylation catalyzed by the DNA methyltransferase CcrM is an essential  
16 epigenetic event of the *Caulobacter* cell cycle. Limiting CcrM to a specific time period  
17 during the cell cycle relies on temporal control of *ccrM* transcription and CcrM  
18 proteolysis. We investigated how Lon, a protease from AAA+ superfamily conserved  
19 from bacteria to humans, temporally degrades CcrM to maintain differential  
20 chromosomal methylation state, thereby regulating transcription factor synthesis and  
21 enabling cell cycle progression. We demonstrate that CcrM degradation by Lon requires  
22 DNA as an adaptor for robust proteolysis. Lon, a DNA-bound protein, is constitutively  
23 active throughout the cell cycle, but allows CcrM mediated DNA methylation only when  
24 CcrM is transcribed and translated upon completion of DNA replication. An additional  
25 mechanism to limit CcrM activity to a narrow window of the cell cycle is its  
26 sequestration to the pole of the progeny stalked cell, which prevents physical contact with  
27 DNA-bound Lon. Thus, we have provided evidence for a novel mechanism for substrate  
28 selection by the Lon protease, providing robust cell cycle control mediated by DNA  
29 methylation.

30

## 31 **Introduction**

32 Epigenetic regulation of gene expression by DNA methylation is a conserved mechanism  
33 in all domains of life (Casadesús and Low, 2006; He et al., 2011; Smith and Meissner,  
34 2013). In most mammalian and plant cells, DNA methylation refers to the addition of a  
35 methyl group to the cytosine bases in the contexts of CG, CHG, and CHH (H = A, C, or  
36 T) (Kim and Zilberman, 2014; Lister et al., 2009). In bacteria, DNA methylation was  
37 originally discovered as a component of restriction-modification (R-M) systems  
38 consisting of an endonuclease and an associated DNA methyltransferase, used to  
39 differentiate the genome DNA from invading phage DNA (Bickle and Krüger, 1993).  
40 However, several solitary DNA methyltransferases without apparent cognate restriction  
41 enzymes were later identified in many bacterial genomes (Collier, 2009; Sánchez-  
42 Romero et al., 2015). These orphan N6-adenine DNA methyltransferases were found to

43 regulate the initiation of chromosome replication, DNA mismatch repair, gene expression,  
44 and cell cycle progression (Collier, 2009; Gonzalez et al., 2014; Iyer et al., 2006;  
45 Reisenauer et al., 1999; Val et al., 2012). The two best-studied examples are  
46 the *Escherichia coli* Dam enzyme (methylating the adenine of GATC) and the  
47 *Caulobacter crescentus* CcrM enzyme (methylating the adenine of GANTC).

48 The  $\alpha$ -proteobacterium *Caulobacter crescentus* is a model system for elucidating the  
49 mechanisms leading to an asymmetric cell division. *Caulobacter* produces two  
50 morphologically distinct progeny at each cell division: a motile swarmer progeny (SWP)  
51 and a sessile stalked progeny (STP) (Figure 1A). The progeny swarmer cell (G1 phase)  
52 cannot initiate chromosome replication until it differentiates into a stalked cell (ST),  
53 whereas the progeny stalked cell immediately initiates chromosome replication and enters  
54 S phase (Figure 1A and 1B). *Caulobacter* initiates chromosome replication once and only  
55 once per cell cycle (Marczynski and Shapiro, 2002). Replication initiates on a fully  
56 methylated chromosome (adenine of GANTC sites is methylated on both strands) and the  
57 movement of the replication fork culminates in the generation of two hemi-methylated  
58 chromosomes (adenine of GANTC is methylated on only one of the two strands) (Figure  
59 1B) (Kozdon et al., 2013). Upon completion of chromosome replication in the pre-  
60 divisional (PD) cell (Figure 1A and 1B), a burst of CcrM protein synthesis converts the  
61 hemi-methylated chromosomes back into two fully methylated chromosomes (Figure 1B).  
62 The methylation state of GANTC motifs within a subset of promoters directly regulates  
63 the transcription of genes comprising the cyclical genetic circuit that drives the cell cycle  
64 (Figure 1C). DnaA serves as an initiator of chromosome replication and as a transcription  
65 factor that controls the transcription of approximately 50 cell cycle-regulated genes  
66 (Hottes et al., 2005). Efficient transcription of *dnaA* (located close to the origin of  
67 replication) requires the GANTC site within its promoter to be in the fully methylated  
68 state. Upon replication initiation, the passage of the replication fork converts the *dnaA*  
69 promoter from the fully methylated state to the hemi-methylated state, thus turning down  
70 the transcription of *dnaA* (Collier et al., 2007). As replication proceeds, the *ctrA* gene,  
71 which is positioned further from the replication origin, transitions from the fully  
72 methylated state to the hemi-methylated state. In the case of the *ctrA* promoter, it is  
73 activated when in the hemi-methylated state (Reisenauer and Shapiro, 2002). The

74 transcription of *ctrA* is controlled by two promoters, one of which, the *ctrAP1*, is  
75 regulated by DNA methylation in a GcrA-dependent manner. The *ctrAP1* is activated  
76 after the replication fork passes through the *ctrAP1* and it becomes hemi-methylated.  
77 GcrA stabilizes RNA polymerase holoenzyme by interacting with  $\sigma 70$ , and stimulates  
78 open complex formation via the presence of a preferred methylation site near the *ctrAP1*  
79 (Haakonsen et al., 2015). DnaA and CtrA have opposite modes of function and regulation  
80 of their transcription. DnaA activates initiation of DNA replication, and transcription of  
81 the *dnaA* gene is activated when its promoter is in a fully methylated state. CtrA inhibits  
82 initiation of DNA replication, and its transcription is activated by GcrA when its  
83 promoter is in the hemi-methylated state. The methylation state of the chromosome,  
84 which is temporally modulated by the passage of the replication fork, controls the  
85 sequential expression of the DnaA and CtrA master transcription factors, which provide a  
86 regulatory hierarchy that activates or represses >300 cell cycle-regulated genes (Zhou et  
87 al., 2015).

88 CcrM is present only during a narrow window of the cell cycle (Figure 1A) coincident  
89 with its time of transcription and translation (Schrader et al., 2016; Zhou et al., 2015).  
90 Following its burst of synthesis, CcrM is cleared from the cell by the Lon protease  
91 (Wright et al., 1996). Lon is a member of the AAA+ protease superfamily that is widely  
92 distributed in all kingdoms of life. In a *lon* deficient strain, CcrM remains detectable  
93 throughout the cell cycle, leading to the accumulation of multiple chromosomes (Wright  
94 et al., 1996; Zweiger et al., 1994). Constitutive overexpression of CcrM results in mis-  
95 regulation of over 10% of cell cycle-controlled genes due to the aberrant GANTC  
96 methylation state of their promoters (Gonzalez et al., 2014), demonstrating that restricted  
97 presence of CcrM to a short time window is essential for controlling cell cycle  
98 progression. Because Lon is normally present throughout the cell cycle, the pre-divisional  
99 cell undergoes an “arms race” between CcrM synthesis and degradation (Wright et al.,  
100 1996). The mechanism that protects CcrM from Lon-mediated degradation in the pre-  
101 divisional cell has remained enigmatic.

102 In this study, we determined that the robust degradation of CcrM requires the presence of  
103 DNA as an adaptor. Lon-mediated proteolysis of CcrM occurs when CcrM binds DNA



104 eliciting a race between catalysis of N6-adenine methylation and CcrM degradation. The  
105 affinities of CcrM-DNA and Lon-DNA are 10-fold higher than that of the direct  
106 interaction between CcrM and Lon. High levels of newly synthesized CcrM in the pre-  
107 divisional cell tilts the race towards complete methylation of ~4500 chromosomal  
108 GANTC sites. Upon cell division, CcrM synthesis stops and Lon degradation of the  
109 remaining CcrM wins the race. Each progeny cell acquires a single fully methylated  
110 chromosome. The daughter swarmer cell, which cannot initiate DNA replication, exhibits  
111 complete degradation of CcrM, in part due to the extended time span of the swarmer-to-  
112 stalked cell transition. However, the progeny stalked cell has inadequate time for the  
113 complete degradation of remaining CcrM before its immediate initiation of DNA  
114 replication. This raises the problem of how the hemi-methylated state of newly  
115 synthesized chromosomal DNA is maintained in the stalked progeny during the ensuing  
116 replication fork progression. We show here that excess CcrM is sequestered to the pole of  
117 the cell away from the chromosome while Lon is bound to DNA, allowing the  
118 propagation of hemi-methylated DNA during replication. The sequestration of remaining  
119 CcrM begins with the initiation of chromosome replication and ends prior to the  
120 formation of the division plane. The robust combination of CcrM sequestration and  
121 clearance of DNA-bound CcrM by Lon protects the replicating chromosome from re-  
122 methylation, thereby coordinating gene expression and replication fork progression.

## 123 **Results**

### 124 **The C-terminal domain of CcrM is required for degradation by the Lon protease** 125 **and for methyltransferase activity**

126 ATP-dependent proteases usually rely on terminal sequences for substrate recognition  
127 (Joshi and Chien, 2016; Sauer and Baker, 2011). To identify the CcrM degradation tag,  
128 we fused an M2 epitope to the N- or C-terminus of natively expressed CcrM on the  
129 chromosome. Swarmer cells expressing a sole copy of M2-CcrM or CcrM-M2 were  
130 isolated and allowed to proceed synchronously through the cell cycle. Samples were  
131 collected every 20 minutes for immunoblot analysis using an anti-CcrM antibody. We  
132 observed that M2-CcrM was proteolyzed until the completion of DNA replication,  
133 whereas CcrM-M2 was present throughout the cell cycle, indicating that the C-terminal

134 M2 tag protected CcrM from degradation by interfering with its recognition by Lon  
135 (Figure 2A).

136 To further validate Lon recognition of the C-terminus of CcrM, truncations lacking the  
137 N-terminal 294 residues of CcrM (CcrM65C) or the C-terminal 65 amino acids  
138 (CcrM $\Delta$ C65) were generated and fused to YFP (Figure 2B). The *in vivo* degradation rates  
139 of these chimeric proteins were measured in wild-type cells and in cells bearing a  
140 deletion of Lon. In the presence of Lon, YFP-CcrM65C was extremely unstable and had  
141 a half-life of ~ 3 min, whereas YFP-CcrM $\Delta$ C65 was stable (Figure 2C). In the absence of  
142 Lon, both YFP-CcrM65C and YFP-CcrM $\Delta$ C65 were all stable (Figure 2C). Our data  
143 indicate that the CcrM C-terminus is necessary and sufficient for Lon recognition.

144 To determine the precise amino acid sequence of the CcrM degradation tag within the C-  
145 terminal 65 amino acids, we generated a series of truncations based on the YFP-  
146 CcrM65C construct (Figure 2D). Turnover of the chimeric proteins was quantified using  
147 a fluorescent microplate reader. The fluorescence levels of wild-type *Caulobacter* strains  
148 harboring plasmids expressing YFP chimeric protein containing 24, 26, 28, 30, or 65 C-  
149 terminal amino acids from CcrM were all significantly depressed, suggesting that the C-  
150 terminal 24 amino acids of CcrM are sufficient to confer Lon-dependent proteolysis  
151 (Figure 2D). The fluorescence data reflect the stability of the chimeric proteins as all YFP  
152 chimeric proteins expressed in a Lon deletion strain maintained high levels of  
153 fluorescence.

154 Given that the CcrM C-terminus is required for its proteolysis, we asked whether the 65  
155 amino acids within the CcrM C-terminus are also required for enzymatic function. We  
156 performed *in vitro* DNA methylation assays using purified CcrM and CcrM $\Delta$ C65 in the  
157 presence of a DNA fragment (hereafter named Probe 1) that contains one methylation site  
158 (GATTC) (Figure 2E). The distances from the methylation site to 5' and 3' ends of the  
159 probe were 1.0 kb and 0.5 kb, respectively. The restriction enzyme *HinfI* can be used to  
160 distinguish methylated and unmethylated DNA because it cuts only the unmethylated  
161 GANTC sequence. When incubated with CcrM and the methyl group donor S-adenosyl  
162 methionine (SAM), *HinfI* was unable to digest Probe 1, indicating that the GATTC site  
163 was methylated (Figure 2E). In contrast, Probe 1 incubated with CcrM $\Delta$ C65 was digested

164 by *Hin*FI, giving two fragments at 1.0 kb and 0.5 kb in length on agarose gels. Combined,  
165 our results demonstrate that C-terminus of CcrM is required for both DNA-  
166 methyltransferase activity and proteolysis by Lon.

### 167 **Conserved C-terminal motifs determine CcrM DNA binding activity**

168 Sequence alignment of the CcrM C-terminus revealed four highly conserved motifs  
169 among CcrM homologues in  $\alpha$ -proteobacteria (Figure S1A). To investigate the roles of  
170 C-terminal conserved motifs in CcrM function, we generated CcrM mutants using alanine  
171 substitution at a conserved residue within each motif (Figure S1A). Mutations of *ccrM*  
172 bearing the alanine-substitutions shown in Fig S1A were introduced into a *ccrM*  
173 depletion strain and expressed under the control of the native *ccrM* promoter. In the  
174 absence of wild-type CcrM, mutations at S315 and W332 caused severe defects in  
175 viability, cell division and morphology, exhibiting filamentous bacterial growth due to  
176 the essentiality of CcrM protein function (Figure S1B-S1D). *In vitro* gel shift assays were  
177 performed using purified CcrM and CcrMS315A to test their DNA binding activity. The  
178 results revealed that wild type CcrM bound Probe 1, but CcrMS315A did not, indicating  
179 that the S315 mutation abolished DNA binding activity (Figure S1E). A W332A  
180 mutation was shown to lack DNA binding activity (Dr. Norbert O. Reich, personal  
181 communication). Thus, two motifs within the conserved C-terminus of CcrM are required  
182 for DNA binding activity.

### 183 **Lon protease binds to DNA and is constitutively active during the *Caulobacter* cell** 184 **cycle**

185 We previously showed that Lon protein abundance does not change during *Caulobacter*  
186 cell cycle (Wright et al., 1996). Although the protein level of Lon is constant, it is  
187 possible that Lon activity is cell cycle-dependent. To address this possibility, we assayed  
188 Lon activity as a function of cell cycle progression using a known substrate that is  
189 degraded directly by Lon in the absence of adaptors and any accessory factors. To  
190 circumvent the possibility that the substrate to be tested has cell cycle-dependent  
191 regulation, we generated an exogenous Lon substrate by tagging the C-terminus of the  
192 YFP protein with a sul20C Lon degradation tag (Gur and Sauer, 2009) driven by the  $P_{xyI}$   
193 promoter with its constitutive expression induced by xylose. We observed that YFP-

194 sul20C was degraded by Lon in a wild-type background, but not in a *Δlon Caulobacter*  
195 mutant (Figure 3A). The YFP-sul20C substrate was used to assess Lon proteolytic  
196 activity in swarmer, stalked, and pre-divisional cells obtained from synchronized cultures.  
197 The results demonstrate that the degradation rate of YFP-sul20C is not significantly  
198 different in three types of cells, suggesting that Lon activity is cell cycle-independent  
199 (Figure 3B).

200 In *E. coli*, up to 95% of Lon molecules are bound to DNA (Karlovicz et al., 2017). To  
201 determine if Lon co-localizes with DNA in *Caulobacter*, we integrated a plasmid bearing  
202 a translational fusion of YFP to the C-terminus of Lon under the control of P<sub>xyI</sub> into the  
203 chromosome of a temperature-sensitive (*ts*) mutant that forms filamentous cells when  
204 grown at the restrictive temperature, generating large DNA-free regions (Ward and  
205 Newton, 1997). A similar construct was made using a Lon mutant (LonQM) that lacks  
206 DNA binding activity (Figure S2A). We ruled out any effect of fusing YFP to Lon N- or  
207 C-terminus on Lon function (Figure S2B). Cultures of the *ts* mutant bearing the Lon-YFP  
208 construct were grown at restrictive temperature in the presence of xylose and imaged by  
209 epifluorescence microscopy. We observed that Lon-YFP co-localized with the DAPI  
210 DNA signal and was absent in DNA-free regions (Figure 3C). In contrast, the LonQM-  
211 YFP signal was observed throughout the entire cell, including the DNA-free regions  
212 (Figure 3C). Cumulatively, these results suggest that Lon binds DNA *in vivo* and its  
213 proteolytic activity is cell cycle-independent.

#### 214 **Both Lon and CcrM are capable of binding to the same DNA probes with high** 215 **affinity**

216 DNA Binding by CcrM is a prerequisite for its chromosome methylation activity. Given  
217 that DNA-bound Lon protease is active throughout the cell cycle, we hypothesized that  
218 CcrM, which has been shown to processively move on DNA (Berdis et al., 1998;  
219 Woodcock et al., 2017), could be recognized by Lon bound to DNA. To test this  
220 hypothesis, we attempted to reconstitute this interaction *in vitro* using three different  
221 DNA probes. Besides the Probe 1 used in our previous methylation assays (Figure 2E),  
222 we designed Probe 2 by mutating Probe 1's methylation site from GATTC to AATAC.  
223 Probe 3 is from a region upstream of the *pilA* gene lacking any GANTC motif (Figure

224 4A). Gel shift assays demonstrated that the purified CcrM protein can bind Probes 1, 2,  
225 and 3, suggesting that the DNA binding capability of CcrM does not require the GANTC  
226 motif (Figure 4B). As expected, in this assay purified CcrM $\Delta$ C65, lacking the DNA  
227 binding domain failed to exhibit DNA binding activity (Figure 4B). This results also  
228 accounts for the observations that the CcrM mutations at S315 and W332 led to complete  
229 inactivation of DNA binding and methyltransferase activity (Figure S1). We found that  
230 the purified Lon protease also binds to all three probes (Figure 4B). Because  
231 unmethylated DNA is absent *in vivo*, we sought to investigate the DNA binding  
232 capabilities of CcrM and Lon using hemi-methylated and fully-methylated DNA probes.  
233 We obtained fully-methylated DNA by incubating PCR-generated Probe 1 with purified  
234 CcrM protein. The hemi-methylated DNA probe was generated by hybridization of fully-  
235 methylated and unmethylated DNA probes. The methylation states of these DNA probes  
236 were confirmed by overlapping restriction digestions (Figure S3A and S3B). We found  
237 that the binding capabilities of CcrM to DNA, as well as to the Lon protease, are  
238 methylation state-independent (Figure S3C). Our results support the hypothesis that both  
239 CcrM and Lon are capable of binding to DNA probes simultaneously and independent of  
240 methylation state.

241 To measure the affinities of Lon binding to DNA and Lon binding to CcrM, we used  
242 microscale thermophoresis (MST) assays (Wienken et al., 2010). To perform MST assays,  
243 we first labeled lysine residues on LonS674A, a mutant protein that lacks proteolytic  
244 activity but retains DNA binding activity (Figure S2A) (Botos et al., 2004; Karlowicz et  
245 al., 2017), with the Atto-488 dye, as indicated by LonS674A\*. We then measured the  
246 change in the thermophoresis of LonS674A\* over a 2-fold serial dilution of either CcrM  
247 or Probe 1. Direct binding was observed between LonS674A\* and CcrM ( $K_D = 1178 \pm 85$   
248 nM) (Figure 4C) and between LonS674A\* and Probe 1 ( $K_D = 83.7 \pm 8.8$  nM) (Figure 4D).  
249 Thus, there is a ~14-fold-weaker affinity between LonS674A\* and CcrM than between  
250 LonS674A\* and DNA Probe 1. Recent studies on DNA recognition by CcrM reported an  
251 equilibrium dissociation constant of  $108 \pm 20$  nM for double-stranded DNA (Woodcock  
252 et al., 2017). We performed a quantitative Western blot to determine the concentration of  
253 CcrM *in vivo* at the 120 minutes-post-synchrony timepoint, using purified CcrM to  
254 calibrate a standard curve (Figure S3D). We determined that the intracellular

255 concentration of CcrM ranged from 950 - 1280 nM over three measurements, averaging  
256  $1090 \pm 135$  nM for pre-divisional cells (Figure S3D). The highest intracellular  
257 concentration of CcrM approached the  $K_D$  value of CcrM-Lon direct interaction. These  
258 findings demonstrate that both Lon and CcrM associates with DNA *in vivo* and *in vitro*,  
259 suggesting that degradation of CcrM *in vivo* may occur while it is bound to DNA (Figure  
260 4E).

### 261 **DNA plays an adapter role in CcrM proteolysis by Lon**

262 To test whether the presence of DNA can stimulate CcrM proteolysis by Lon, we  
263 performed *in vitro* degradation assays in the presence of the DNA probes described in  
264 Figure 4A. The addition of Probe 1, containing the GATTC methylation recognition site,  
265 dramatically boosted CcrM degradation (Figure 5A). Strikingly, the addition of Probe 2  
266 (the same as Probe 1 but with a scrambled DNA methylation site) or Probe 3 (with a non-  
267 specific DNA sequence) produced CcrM degradation rates similar to that observed in the  
268 presence of Probe 1. These results suggest that CcrM degradation stimulated by DNA  
269 does not depend on the presence of a methylation site or a specific DNA sequence  
270 (Figure 5A). As a negative control, the degradation of CcrM $\Delta$ C65 was not observed in  
271 the presence or absence of DNA (Figure 5A). Titration of DNA showed that increasing  
272 concentrations increased the rate of CcrM proteolysis, but reached a maximum rate of  
273 degradation around 10 nM concentration of DNA (Figure 5B). DNA has been reported to  
274 stimulate Lon ATPase activity (Charette et al., 1984; Chung and Goldberg, 1982;  
275 Zehnbauer et al., 1981). We found that both DNA and the degradation substrate CcrM  
276 stimulate Lon ATPase activity, but that addition of both did not further stimulate the  
277 ATPase (Figure 5C). Degradation kinetics of  $\beta$ -casein, a non-DNA binding Lon substrate,  
278 was also measured in the presence and absence of DNA. We did not observe stimulated  
279  $\beta$ -casein proteolysis, indicating that DNA-facilitated proteolysis might be restricted to  
280 DNA-binding substrates (Figure S4A). To test whether stimulated proteolysis requires  
281 both CcrM and Lon to bind DNA, we performed *in vitro* degradation assays using  
282 previously identified DNA-binding deficient mutants, CcrMS315A (Figure S1E) and  
283 LonQM (Figure S2A). The LonQM mutant exhibited intact proteolytic activity on  $\beta$ -  
284 casein, a non-DNA binding substrate (Figure S4B). We found that DNA failed to



285 stimulate CcrMS315A degradation by wild-type Lon. Similarly, CcrM degradation by  
286 LonQM was not stimulated by the addition of DNA (Figure 5D). Thus, DNA-facilitated  
287 proteolysis requires both protease and substrate to bind DNA.

288 Further, we performed co-immunoprecipitation (Co-IP) of the reconstituted reactions to  
289 determine whether CcrM-Lon-DNA can form nucleoprotein complexes. We first  
290 conducted Co-IP using low concentrations of CcrM substrate (0.4  $\mu$ M). CcrM co-  
291 immunoprecipitated with LonS674A only if DNA was present, demonstrating that  
292 recognition of CcrM by Lon relies on the presence of DNA (Figure 5E). Only a small  
293 fraction of CcrM co-immunoprecipitated with LonS674A in the absence of DNA under  
294 the physiological concentrations of CcrM (1  $\mu$ M) (Figure 5E). When we performed  
295 similar assays using elevated concentrations of the CcrM substrate (4  $\mu$ M), CcrM co-  
296 immunoprecipitated with LonS674A, independent of the presence of DNA (Figure 5E).  
297 These results support our suggestion that DNA-dependent CcrM recognition by Lon  
298 occurs under physiological concentrations of CcrM. We determined that the intracellular  
299 concentration of CcrM is approximately 1  $\mu$ M (Figure S3D). The *in vitro* degradation of  
300 CcrM by Lon is dependent on DNA when CcrM is present at 0.4  $\mu$ M, but not at 4  $\mu$ M  
301 CcrM, which is 4 times higher than the physiological concentration. Taken together, we  
302 propose a model where the robust degradation of CcrM requires both CcrM and Lon to  
303 interact while bound to DNA during the processive movement of CcrM (Figure 5F). The  
304 binding of the Lon protease to DNA does not allosterically stimulate substrate  
305 degradation. Instead, DNA plays an adaptor role in facilitating Lon recognition of CcrM  
306 under physiological conditions.

### 307 **Dynamic sequestration of CcrM at the new pole discriminates *Caulobacter* swarmer** 308 **and stalked cell cycles**

309 To determine if CcrM is protected from interaction with its substrate DNA prior to its  
310 complete digestion by Lon, we imaged cells in which CcrM was tagged with YFP. We  
311 constructed a strain expressing a sole chromosomal copy of *ccrM*, *yfp-ccrM*, under the  
312 control of its native promoter. YFP-CcrM fully complemented a  $\Delta$ *ccrM* strain. Strikingly,  
313 fluorescence microscopy revealed that YFP-CcrM formed a focus at the pole opposite the  
314 SpmX stalked pole marker (Jiang et al., 2014; Perez et al., 2017), demonstrating that

315 YFP-CcrM accumulated at the new cell pole of the progeny stalked cell generated by cell  
316 division (Figure 6A). Among 444 analyzed cells in a mixed population, we observed that  
317 29.50% of cells (n = 131) had a unipolar focus, while 40.99% of cells (n = 182) showed  
318 no detectable fluorescent signal. We also observed diffuse signal in 18.92% of examined  
319 cells (n = 84), suggesting that polar localization of CcrM is dynamic (Figure 6A). In these  
320 experiments, the cell population had two different types of stalked cells; those that result  
321 from the swarmer-to-stalked cell transition (that do not contain CcrM, Figure 2A) and  
322 those that result from cell division, accounting for the large population of cells with no  
323 fluorescent signal.

324 To examine the subcellular distribution of CcrM during the cell cycle originating from  
325 the stalked cell arising from a cell division (Figure 6E), we used time-lapse microscopy  
326 to track cells (n > 100) that had a YFP-CcrM fluorescent focus at the new pole. A YFP-  
327 CcrM focus was consistently detected at the new pole of the progeny stalked cell and  
328 faded away during the transition to a pre-divisional cell (Figure 6B). Upon cell division,  
329 the YFP-CcrM focus appeared again at the incipient new pole of the stalked progeny cell,  
330 while no detectable signal was observed in the swarmer progeny (Figure 6B). To obtain  
331 the precise time of CcrM's polar presence according to cell cycle milestone events, we  
332 carried out time-lapse microscopy of cells co-expressing YFP-CcrM and ParB-mCherry  
333 or TipN-GFP. ParB is a DNA-partitioning protein that binds to the centromeric *parS*  
334 locus near the chromosomal origin of replication. Localization of ParB reflects the  
335 movement of the ParB-bound centromere from the old pole to the new pole immediately  
336 upon the initiation of DNA replication (Ptacin et al., 2010). We observed the co-  
337 appearance of the YFP-CcrM focus and the ParB-*parS* complex at the new pole of the  
338 progeny stalked cell, suggesting that the sequestration of CcrM and initiation of  
339 chromosome replication begins at the same time (Figure 6C). In addition, TipN is a new  
340 cell pole marker that orients the polarity axis and its medial relocation reflects Z-ring  
341 formation at the division plane (Huitema et al., 2006; Lam et al., 2006). YFP-CcrM co-  
342 localized with TipN-GFP at the new pole of stalked cells (Figure 6D). During the  
343 transition from the stalked cell to the pre-divisional cell, when TipN-GFP left the new  
344 pole and started relocating to mid cell, YFP-CcrM was released from the pole together  
345 with TipN-GFP, demonstrating that CcrM polar sequestration ends prior to the formation



346 of the division plane (Figure 6D). We did not observe an interaction between CcrM and  
347 TipN in a bacterial two-hybrid assay, implying that releasing of CcrM from the cell pole  
348 might be independent of the release of TipN (Figure S5A). We propose that any CcrM  
349 not cleared from the cell by proteolysis in the short time between cell division and the  
350 initiation of replication in the progeny stalked cell is inactivated by sequestration, thereby  
351 enabling the activation of gene transcription that requires hemi-methylated promoters.  
352 CcrM is dynamically sequestered to the new pole of only the stalked cell progeny. Thus,  
353 the distinct CcrM localization pattern between the two progeny cells thus discriminates  
354 *Caulobacter* swarmer and stalked cell cycles (Figure 6E).

### 355 **Polar sequestration stabilizes CcrM by preventing physical contact with Lon on** 356 **DNA**

357 Given that dynamic sequestration of CcrM at the new pole of the stalked cell occurs  
358 during the stalked cell cycle, and robust clearance of CcrM requires DNA as an adaptor,  
359 it is tempting to speculate that there are distinct patterns of CcrM proteolysis during the  
360 swarmer and stalked cell cycles (Figure 6E). Accordingly, we isolated progeny swarmer  
361 and stalked cells generated after the division of pre-divisional cells obtained from a  
362 synchronized cell population. Each progeny cell was then allowed to proceed through the  
363 cell cycle until 160 mps (Figure 7A II). CcrM in the progeny swarmer cell was degraded  
364 within 20 min (Note that in Figure 7A I, the swarmer cell population obtained from the  
365 original synchrony of a mixed population of cells contains swarmer cells primarily from  
366 20-30 min of their development, by which time CcrM is completely degraded). CcrM  
367 was not completely cleared from the progeny stalked cell (Figure 7A II) although it was  
368 completely cleared from the stalked cell that resulted from the swarmer to stalked cell  
369 transition (Figure 7A I). As the progeny stalked cell progressed to the pre-divisional cell,  
370 we observed an increased abundance of CcrM commensurate with the increased synthesis  
371 of CcrM. (Figure 7A II). *In vivo* stability assays revealed that CcrM was quite stable  
372 although Lon was present (Figure S6A). We also observed a greater stability of CcrM in  
373 mixed swarmer and stalked progeny cells (collected at 160 mps) than in pre-divisional  
374 cells (collected at 120 mps) after 10 min shutoff of protein synthesis (Figure S6B). In  
375 *Δlon* cells, CcrM protein levels were stable throughout the experiment (Figure S6B).

376 The stable presence of CcrM in stalked cells derived from pre-divisional cells (Figure 7A  
377 II) suggests that CcrM may be specifically protected from Lon proteolysis by  
378 sequestration away from its DNA target during the stalked cell phase. To determine how  
379 CcrM degradation rate changes as a function of cell cycle, we created CcrM merodiploid  
380 strains by inserting *yfp-ccrM* under the control of the inducible xylose promoter as a  
381 single copy on the chromosome in wild-type or  $\Delta lon$  backgrounds. In this genetic  
382 background, which equally produces CcrM at all cell cycle phases rather than only during  
383 pre-divisional cells, changes in protein abundance reflect changes in degradation rate. We  
384 performed immunoblots to monitor the presence of YFP-CcrM throughout the swarmer  
385 cell cycle. Interestingly, we found that in merodiploid cells containing Lon, the YFP-  
386 CcrM levels were low in swarmer cells, increased to the highest amount at ~ 80 mps, and  
387 decreased again during later stages of the cell cycle (Figure 7B). In contrast, the YFP-  
388 CcrM levels were constant during cell cycle progression in the  $\Delta lon$  background. Thus,  
389 CcrM is protected from Lon degradation between 60 mps and 80 mps of the swarmer cell  
390 cycle, which is consistent with the timing of CcrM sequestration during the stalked cell  
391 cycle.

392 To confirm differential CcrM turnover when CcrM is constitutively present during the  
393 cell cycle, we measured YFP-CcrM stabilities in merodiploid cells in the presence and  
394 absence of Lon. Translation shutoff assays by antibiotic addition were carried out using  
395 samples collected at 0 mps, 60 mps, and 120 mps during the swarmer cell cycle. We  
396 observed a robust degradation of YFP-CcrM protein in samples taken at 0 and 120 mps  
397 with measured half-lives of ~7 min in the presence of Lon (Figure 7C). For cells grown  
398 in the presence of Lon that were collected at 60 mps, however, YFP-CcrM degradation  
399 was not observed (Figure 7C). As a control, degradation was not observed in the absence  
400 of Lon at all time points.

401 In conclusion, CcrM is proteolyzed in swarmer cells, and there is no CcrM present in  
402 these cells until it is resynthesized during the pre-divisional stage. Though Lon is active  
403 during all phases of the cell cycle (Figure 3A), stalked cells can specifically sequester any  
404 CcrM that is present at the new cell pole, protecting it from interaction with DNA and the  
405 proteolysis by DNA-bound Lon during this phase (Figure 6B, Figure 7C). Thus, the

406 CcrM inherited by stalked progeny from a pre-divisional cell is kept in an inactive state  
407 and consequently protected from proteolysis (Figure 7D). More broadly, this finding  
408 indicates that stalked cells arising from pre-divisional cells fundamentally differ from  
409 swarmer-derived stalked cells in their protein content, thus representing two distinct  
410 variants of the cell cycle.

## 411 **Discussion**

412 Here we propose a model of CcrM protein turnover determined by coordinated DNA-  
413 facilitated protein degradation and CcrM sequestration during cell cycle progression.  
414 Although Lon is present and active throughout the cell cycle, CcrM transcription and  
415 translation is confined to the pre-divisional cell (Schrader et al., 2016; Zhou et al., 2015).  
416 At this time in the cell cycle, CcrM wins the race between synthesis and degradation and  
417 CcrM proceeds to processively methylate GANTC sites on the chromosome (Kozdon et  
418 al., 2013; Woodcock et al., 2017). When CcrM synthesis stops, Lon continues to clear  
419 CcrM from the cell. We show that robust degradation of CcrM by Lon requires the  
420 presence of DNA as an adaptor. Both CcrM and Lon have ~14-fold higher affinities for  
421 DNA than for each other, contributing to the high efficiency of DNA methylation of  
422 ~4500 GANTC sites by only ~600 CcrM molecules during a short time window of the  
423 cell cycle. Upon cell division, CcrM protein turnover varies between two daughter cells,  
424 giving rise to distinct swarmer and stalked cell cycles (Figure 7D). In the swarmer cell  
425 cycle, remaining CcrM inherited from pre-divisional cell is completely degraded during  
426 the swarmer-stalked cell transition (G1) via DNA-facilitated proteolysis (Figure 7D).  
427 Transcription and translation of CcrM are repressed in early S phase and re-activated in  
428 late S phase. The abundance of CcrM reaches its lowest point in early S phase due to  
429 repressed transcription and translation. In the stalked cell cycle, remaining CcrM  
430 inherited from the pre-divisional cells is sequestered to the new cell pole, concurrent with  
431 the immediate initiation of chromosome replication at the stalked cell progeny (Figure  
432 7D). This sequestration of CcrM prevents DNA re-methylation during replication while  
433 also preventing its degradation by eliminating physical contact with the DNA-bound  
434 protease Lon. The sequestered CcrM is released from the pole at the time of new CcrM  
435 synthesis in the pre-divisional cell.

436 **DNA facilitated-proteolysis verses allosteric stimulation by other Lon substrates or**  
437 **unfolded proteins**

438 Compared to the ClpXP protease that utilizes diverse adaptors for substrate delivery, Lon  
439 protease appears to process its substrate by directly recognizing clusters of exposed  
440 hydrophobic residues within a given polypeptide with little sequence specificity (Gur and  
441 Sauer, 2008). The first Lon substrate-specific adaptor, SmiA (swarming motility inhibitor  
442 A), was recently identified in *Bacillus subtilis*. Lon degrades the master flagellar activator  
443 protein SwrA only in the presence of SmiA. SmiA-dependent proteolysis is abolished  
444 upon surface contact causing SwrA protein levels to be stabilized and consequently  
445 increase motility (Mukherjee et al., 2015). In *Caulobacter*, Lon has been shown to  
446 degrade DnaA under proteotoxic stress leading to a cell cycle arrest (Jonas et al., 2013).  
447 *In vitro* experiments demonstrated that Lon alone cannot robustly degrade DnaA, but the  
448 addition of an unfolded substrate can allosterically activate Lon (Jonas et al., 2013).  
449 Similarly, heat shock protein Q (HspQ) was identified as a unique specificity-enhancing  
450 factor of Lon (Puri and Karzai, 2017). The addition of HspQ allosterically activates Lon  
451 and enhances the degradation of YmoA, a small histone-like protein whose efficient  
452 removal is required for bacterial virulence (Puri and Karzai, 2017). Given that adaptor-  
453 mediated proteolytic specificity for Lon protease is quite varied, Lon may employ  
454 multiple distinct mechanisms to regulate substrate specificity and degradation.

455 DNA binding activity of Lon was discovered three decades ago (Charette et al., 1984).  
456 Although several lines of evidence suggested that Lon binding to DNA can stimulate its  
457 ATPase activity and substrate degradation, the roles of this interaction in regulating  
458 substrate specificity and degradation remained to be elucidated. We showed here that the  
459 robust degradation of CcrM requires the binding of substrate and protease to DNA  
460 (Figure 4 and 5). Notably, DNA mediated activation of Lon degradation of CcrM cannot  
461 be ascribed to stimulated ATPase activity upon binding to DNA. The presence of  
462 substrate alone can induce the ATPase activity to a level similar to that induced by the  
463 co-presence of substrate and DNA (Figure 5C) and the presence of DNA does not  
464 stimulate degradation of non-DNA binding substrates (Figure S4A). Our results  
465 demonstrate that DNA serves as an adaptor for Lon-mediated CcrM proteolysis by

466 facilitating substrate recognition rather than allosterically regulating Lon proteolytic  
467 activity. As a substrate for CcrM, DNA moonlights as an adaptor aiding CcrM delivery to  
468 the protease, which also prevents early degradation of CcrM prior to chromosomal  
469 methylation. In mitochondria of eukaryotic cells, Lon mutations were shown to be  
470 involved in multiple genetic diseases and cancer (Pinti et al., 2016). In prokaryotes, Lon  
471 is known to degrade multiple transcriptional regulators controlling the cell cycle, biofilm  
472 formation, motility and stress tolerance, and virulence (Breidenstein et al., 2012; Matsui  
473 et al., 2003; Rogers et al., 2016; Wright et al., 1996). Examples of Lon substrates in  
474 *Caulobacter* include CcrM, SciP and DnaA (Gora et al., 2013; Jonas et al., 2013; Wright  
475 et al., 1996), which all contribute to cell cycle regulation by their DNA binding activities.  
476 It is therefore conceivable that DNA-facilitated proteolysis may be a universal regulatory  
477 mechanism for specific recognition and degradation of DNA binding substrates. A  
478 corollary to this model is that Lon could temporally degrade a given substrate based on  
479 its own DNA-binding characteristics, so that a degradation hierarchy can be  
480 accommodated by a single factor and be achieved on a single platform. However, DNA-  
481 binding substrates other than CcrM, which lack processive movement along the DNA,  
482 may be regulated in a different mode or require involvement of other accessory factors.

### 483 **CcrM sequestration to the new cell pole**

484 Bacterial cells employ multiple mechanisms to drive protein localization to the cell poles  
485 (Laloux et al., 2014; Rudner and Losick, 2010). We observed that the CcrM DNA  
486 methyltransferase is dynamically sequestered to the new pole of the progeny stalked cell  
487 (Figure 6). *Caulobacter* has been shown to recruit proteins to the cell poles through  
488 interaction with proteins or protein complexes that are already positioned at the pole.  
489 For example, the polar PopZ protein forms a microdomain that anchors the chromosome  
490 origin via its interaction with the chromosome partition complex ParB-*parS* (Bowman et  
491 al., 2008; Ebersbach et al., 2008). In addition, the stalked pole-localized protein, SpmX,  
492 serves as a bridge to direct the interaction between the DivJ histidine kinase and PopZ  
493 microdomain (Perez et al., 2017). Although the mechanism that localizes PopZ to the  
494 pole is not known, the PopZ microdomain captures multiple signaling proteins, thereby  
495 integrating several cellular processes within this membranes-less organelle (Bergé and

496 Viollier, 2017; Holmes et al., 2016; Lasker et al., 2017). However, CcrM polar foci were  
497 observed in *ΔpopZ* strains, arguing that CcrM sequestration is PopZ-independent (Figure  
498 S5B). Assays of CcrM polar localization in strains lacking new pole-located proteins,  
499 including *ΔmopJ*, *ΔpodJ*, and a truncated *divL* (*divLΔ28*) showed that these proteins were  
500 also not necessary for CcrM sequestration (Figure S5B). A bacterial two-hybrid assay  
501 showed that CcrM does not interact with PleC, TipN, nor TipF (Figure S5A). Although  
502 unlikely that these proteins play a role in polar sequestration of CcrM, it is possible that  
503 CcrM can be captured by as yet unknown proteins so that the remaining CcrM molecules  
504 are not free to bind chromosomal DNA.

505 Mechanisms other than protein interaction may enable CcrM polar sequestration. Both  
506 CcrM and TipN are released from the cell pole prior to the formation of division plane  
507 (Figure 6D). The signals that trigger the dissociation of CcrM from the new pole are  
508 unknown. Narayanan and colleagues reported dynamic intracellular redox rhythms during  
509 the *Caulobacter* cell cycle (Narayanan et al., 2015), which precisely correspond to the  
510 dynamics of CcrM sequestration. The cytoplasm of the swarmer cell is in a reduced state  
511 during the G1 phase of the cell cycle. The reduced state then shifts to an oxidized state  
512 during the swarmer-to-stalk transition and early S phase. In late S phase, the stalked  
513 compartment of the pre-divisional cell remains in an oxidized state, while the swarmer  
514 compartment enters a reduced state. Intracellular redox state controls protein function and  
515 localization through formations of cysteine disulfide bond (Cremers and Jakob, 2013;  
516 Mou et al., 2003). In *Caulobacter*, NstA, a negative switch for topoisomerase IV (topo  
517 IV), inhibits decatenation activity of the topo IV by binding to the ParC DNA-binding  
518 subunit of topo IV (Narayanan et al., 2015). The activation of NstA requires dimerization  
519 by formation of intermolecular cysteine disulfide bonds under oxidizing conditions in  
520 early S phase. Trx1 was recently reported to be specifically induced in early S phase to  
521 counteract oxidizing stress (Goemans et al., 2018). CcrM contains two conserved  
522 cysteines (C13 and C329), of which the latter is located in a motif that is critical for DNA  
523 binding activity. It is possible that the localization of CcrM could be regulated by redox  
524 changes during the cell cycle.



525 **Asymmetric sequestration of CcrM fine tunes the access of CcrM to its DNA**  
526 **substrate**

527 Replication is initiated on a fully methylated chromosome in the progeny stalked cell and  
528 in the stalked cell that arises from the swarmer-to-stalked cell transition. We have  
529 provided evidence that CcrM is processed differently in these two types of stalked cells.  
530 The progeny swarmer cell, which cannot initiate DNA replication, has 1/3 of the cell  
531 cycle to clear out CcrM before it differentiates into a stalked cell and its concurrent  
532 initiation of replication. The progeny stalked cell, on the other hand, immediately initiates  
533 replication and has very little time to clear out remaining CcrM. We have discovered that  
534 *Caulobacter* has devised a way to sequester CcrM so that it is not available to methylate  
535 the newly replicated strands of DNA in the progeny stalked cell, which would  
536 compromise cell cycle progression.

537 To prevent any residual CcrM activity, we observed that CcrM is sequestered to the new  
538 cell pole (Figure 6) where we hypothesize that it is prevented from accessing DNA. In  
539 support of this, we observed that sequestered CcrM is not degraded by DNA-bound Lon.  
540 Further, it is likely that CcrM does not bind chromosomal DNA at or near the origin of  
541 replication when sequestered at the pole because the ParB-*parS* complex is dissociated  
542 from the cell poles in  $\Delta popZ$  strain (Bowman et al., 2008; Ebersbach et al., 2008), while  
543 CcrM remains at the pole in a PopZ deletion strain (Figure S5B). The sequestration of  
544 CcrM would allow the newly synthesized chromosomal DNA to remain in the hemi-  
545 methylated state, thereby maintaining temporal control of transcription of cell cycle-  
546 regulated genes as the function of the passage of the replication fork. On the other hand,  
547 polar sequestration of CcrM would also prevent physical interaction with the DNA-bound  
548 Lon protease, thus stabilizing sequestered CcrM during S phase in the stalked cell cycle  
549 (Figure 7B). We propose that in the pre-divisional cell of the stalked cell cycle,  
550 sequestered CcrM is released from the pole, where it and newly synthesized CcrM binds  
551 DNA for processive m6A catalysis. The different patterns of CcrM degradation and  
552 sequestration during the swarmer and stalked cell cycles provide a fine-tuning  
553 mechanism that ensures that the immediate chromosome replication in the progeny  
554 stalked cell can proceed in the absence of re-methylation during DNA replication.

## 555 **Methods**

### 556 **Bacterial strains, plasmids and growth conditions**

557 Bacterial strains and plasmids used in this study are listed in Table S1. Primers used for  
558 this study are listed in Table S2. *E. coli* strains were routinely grown in LB medium at 37  
559 °C with appropriate antibiotics (100 µg ml<sup>-1</sup> ampicillin, 50 µg ml<sup>-1</sup> kanamycin).

560 *Caulobacter* strains were grown in PYE (rich medium) or M2G (minimal medium) at 37  
561 °C, supplemented with 0.3% xylose when necessary. Antibiotics were supplemented as  
562 needed for solid and liquid media, respectively, with the following concentration:

563 kanamycin (25 µg ml<sup>-1</sup> or 5 µg ml<sup>-1</sup>), spectinomycin (50 µg ml<sup>-1</sup> or 25 µg ml<sup>-1</sup>),

564 oxytetracycline (2 µg ml<sup>-1</sup> or 1 µg ml<sup>-1</sup>), gentamycin (10 µg ml<sup>-1</sup> or 5 µg ml<sup>-1</sup>).

### 565 **Strain construction**

566 To construct XZC13 and XZC14, plasmids pNP138-M2-CcrM and pNP138-CcrM-M2  
567 were introduced into NA1000 by electroporation, respectively. Clones that have

568 integrated the vector at the *ccrM* locus were selected on PYE plates containing

569 kanamycin. A second recombination step was performed to select for plasmid excision.

570 Colonies arising from the first integrants were grown in PYE plain for at least 6 hours.

571 Cells were serially diluted for counter-selection on PYE containing 3% sucrose. Colonies  
572 grown on PYE sucrose plates were replicated on PYE containing kanamycin for selection

573 of plasmid excision. Colonies that were able to grow on PYE sucrose, but not on PYE

574 kanamycin plates were grown in liquid PYE plain medium for PCR verification.

575 To characterize the role of CcrM C-terminus in proteolysis, XZC34, XZC35, and XZC36  
576 were constructed by electroplating pXYFPN2-CcrM, pXYFPN2-CcrM65C, and

577 pXYFPN2-CcrMΔC65 into NA1000, respectively. XZC154, XZC161, and XZC88 were

578 constructed by electroplating pXYFPN2-CcrM, pXYFPN2-CcrM65C, and pXYFPN2-

579 CcrMΔC65 into LS2382, respectively.

580 To identify CcrM degradation tag, strains XZC105 and XZC160 were generated by  
581 electroporating pXYFPN2-CcrM30C into NA1000 or LS2382, respectively. Strains

582 XZC139, XZC138, XZC144, XZC143, XZC137, XZC106, XZC108, XZC109, XZC114

583 were constructed similarly to XZC105, except that plasmid pXYFPN2-CcrM28C,



584 pXYFPN2-CcrM26C, pXYFPN2-CcrM24C, pXYFPN2-CcrM23C, pXYFPN2-CcrM22C,  
585 pXYFPN2-CcrM20C, pXYFPN2-CcrM15C, pXYFPN2-CcrM10C, or pXYFPN2-  
586 CcrM8C, respectively, was used for electroporation. Strains XZC159, XZC158, XZC162,  
587 XZC163, XZC157, XZC164, XZC156, XZC155, XZC165 were constructed similarly to  
588 XZC160, except that plasmid pXYFPN2-CcrM28C, pXYFPN2-CcrM26C, pXYFPN2-  
589 CcrM24C, pXYFPN2-CcrM23C, pXYFPN2-CcrM22C, pXYFPN2-CcrM20C,  
590 pXYFPN2-CcrM15C, pXYFPN2-CcrM10C, or pXYFPN2-CcrM8C, respectively, was  
591 used for electroporation.

592 To mutate the conserved amino acids at C-terminal of CcrM, strains XZC121, XZC129,  
593 XZC135, XZC134, XZC131 were constructed by electroporating plasmid pXMCS2-  
594 CcrMD304A, pXMCS2-CcrMS315A, pXMCS2-CcrMW332A, pXMCS2-CcrMS350A  
595 or pXMCS2-CcrMS347A into NA1000, respectively. The integration of the plasmid at  
596 the *ccrM* locus was further verified by PCR.

597 To identify Lon activity during cell cycle, strains XZC6 and XZC86 were generated by  
598 electroporating pXYFPN2-sul20C into NA1000 or LS2382, respectively. To investigate  
599 the subcellular localization of Lon protease, strains XZC142 and XZC148 were generated  
600 by electroporating plasmid pXYFPC2-Lon or pXYFPC2-LonQM into PC6340,  
601 respectively. Strains XZC20 was generated by electroporating plasmid pCHYC2-Lon  
602 into NA1000. XZC23 was constructed similarly to XZC13, except that the plasmid  
603 pNP138-mCherry-Lon was used for electroporation.

604 To identify the dynamic localization of CcrM during cell cycle, XZC24 was constructed  
605 similarly to XZC13, except that the plasmids pNP138-YFP-CcrM was used for  
606 electroporation. Strains XZC75 and XZC112 were generated by electroporating plasmid  
607 pCHYC1-SpmX or pCHYC1-ParB into XZC24, respectively. XZC89 was constructed by  
608 transducing *tipN-gfp* (*gent'*) from CJW1406 into XZC13.

609 To observe whether CcrM localization is dependent on polar localized proteins, strain  
610 XZC49 was constructed by phage transducing from GB255 into XZC24. XZC50 was  
611 constructed by electroporating pXYFPN2-CcrM into LS4461. Strains XZC68, XZC71,  
612 XZC69, XZC70 were constructed by electroporating plasmid pMCS2-podJ, pMCS2-  
613 mopJ, pMCS2-perP or pMCS2-spmX into XZC24, respectively.

614 **Expression plasmids**

615 To generate pET28b-CcrM, the *ccrM* ORF including stop codon was amplified using  
616 KOD DNA Polymerase (EMD Millipore) and inserted into pET28b digested with *NdeI*  
617 and *EcoRI* via Gibson assembly (NEB). Plasmid pET28b-Lon was generated similarly to  
618 pET28b-CcrM, except PCR amplification of the *lon* ORF. Plasmids pET28b-CcrM $\Delta$ C65,  
619 pET28b-CcrMS315A, pET28b-LonS674A, and pET28b-LonQM were generated by  
620 mutagenesis using Q5 Site-Directed Mutagenesis Kit (NEB).

621 **Integrating plasmids**

622 The integration vector pNP138-M2-CcrM was constructed by amplifying an upstream  
623 and downstream homology region of *ccrM* using primer pairs M2ccrmLB-F/M2ccrmLB-  
624 R and M2ccrmRB-F/M2ccrmRB-R, respectively. The two fragments were inserted into  
625 *SpeI-EcoRI* digested vector pNPTS138 via Gibson assembly to yield pNP138-M2-CcrM.  
626 pNP138-CcrM-M2 was constructed similarly to pNP138-M2-CcrM, except that primer  
627 pairs ccrmM2LB-F/ccrmM2LB-R and ccrmM2RB-F/ccrmM2RB-R were used for PCR  
628 amplification. pNP138-YFP-CcrM and pNP138-mCherry-Lon were generated using a  
629 similar strategy.

630 To construct pXYFPN2-CcrM, the *ccrM* ORF was amplified and inserted into *KpnI*-  
631 *EcoRI* digested pXYFPN2 via Gibson assembly. pXYFPN2-CcrM $\Delta$ C65 was constructed  
632 similarly to pXYFPN2-CcrM, except amplification of *ccrM* ORF lacking C-terminal 65  
633 amino acids. The other pXYFPN2-CcrM derivative plasmids were generated by Q5  
634 mutagenesis using pXYFPN2-CcrM as the backbone. Primers used for mutagenesis are  
635 listed in Table S2.

636 To construct pXYFPN2-sul20C, primer pair sul20C-F/sul20C-R was used to amplify  
637 pXYFPN2 backbone and the sul20C degradation tag was inserted by Q5 mutagenesis.

638 To construct pXYFPC2-Lon, the *lon* ORF lacking stop codon was amplified and inserted  
639 into *NdeI-KpnI* digested pXYFPC2 via Gibson assembly. pXYFPC2-LonQM was  
640 generated by Q5 mutagenesis based on pXYFPC2-Lon using primer pairs Lon(4m)MU-  
641 F/Lon(4m)MU-R. To construct pCHYC2-Lon, the fragment encoding Lon 407-799

642 amino acids was amplified and inserted into *NdeI-KpnI* digested pCHYC2 via Gibson  
643 assembly.

644 To construct pCHYC1-SpmX, the fragment encoding SpmX 207-431 amino acids was  
645 amplified and inserted into *NdeI-KpnI* digested pCHYC1 via Gibson assembly.

646 To construct pCHYC1-ParB, the fragment encoding ParB 104-304 amino acids was  
647 amplified and inserted into *NdeI-KpnI* digested pCHYC1 via Gibson assembly.

648 To construct pXMCS2-CcrM, the *ccrM* ORF was amplified and inserted into *NdeI-KpnI*  
649 digested pXMCS2 via Gibson assembly. The resultant plasmid was used to generate  
650 pXMCS2-CcrMD304A, pXMCS2-CcrMS315A, pXMCS2-CcrMW332A, pXMCS2-  
651 CcrMR350A, and pXMCS2-CcrMD347A by Q5 mutagenesis.

652 To construct pKNT25-CcrM and pKT25-CcrM, the *ccrM* ORF was amplified and  
653 inserted into *HindIII-BamHI* digested pKNT25 or *BamHI-EcoRI* digested pKT25 via  
654 Gibson assembly, respectively. To construct pUT18-PleC, the fragment encoding PleC 7-  
655 842 amino acids was amplified and inserted into *HindIII-BamHI* digested pUT18 via  
656 Gibson assembly. To construct pUT18-PleC, the fragment encoding PleC 7-842 amino  
657 acids was amplified and inserted into *HindIII-BamHI* digested pUT18 via Gibson  
658 assembly. To construct pUT18-DivL, the fragment encoding DivL 2-768 amino acids  
659 was amplified and inserted into *HindIII-BamHI* digested pUT18 via Gibson assembly. To  
660 construct pUT18C-PodJ, the *podJ* ORF was amplified and inserted into *BamHI-EcoRI*  
661 digested pUT18C via Gibson assembly. To construct pUT18-TipN, the fragment  
662 encoding TipN 2-882 amino acids was amplified and inserted into *HindIII-BamHI*  
663 digested pUT18 via Gibson assembly. To construct pUT18-TipF, the fragment encoding  
664 TipF 2-452 amino acids was amplified and inserted into *HindIII-BamHI* digested pUT18  
665 via Gibson assembly.

666 To construct pMCS2-mopJ, the fragment encoding MopJ 6-144 amino acids was  
667 amplified and inserted into *NdeI-NheI* digested pMCS2 via Gibson assembly. To  
668 construct pMCS2-spmX, the fragment encoding SpmX 12-290 amino acids was  
669 amplified and inserted into *NdeI-NheI* digested pMCS2 via Gibson assembly. To  
670 construct pMCS2-podJ, the fragment encoding PodJ 28-423 amino acids was amplified

671 and inserted into *NdeI-NheI* digested pMCS2 via Gibson assembly. To construct pMCS2-  
672 perP, the fragment encoding PerP 23-155 amino acids was amplified and inserted into  
673 *NdeI-NheI* digested pMCS2 via Gibson assembly.

#### 674 ***Caulobacter* synchronization**

675 The synchronization experiment was performed as previously described (Schrader and  
676 Shapiro, 2015). The synchronized swarmer cells were released into M2G medium  
677 supplied with certain antibiotics as needed. Samples were taken every 20 min for further  
678 analysis as indicated in the figure. For the double-synchronization experiment, the  
679 swarmer cells raised from the first synchronization were released and grown into M2G  
680 medium at 30 °C. Cells were collected at 160 minutes past synchrony (mps) and  
681 subjected to the second synchronization. The swarmer and stalked fractions were  
682 collected, released into M2G, and monitored for cell cycle progression every 20 min.

#### 683 **Protein purification**

684 *Caulobacter* Lon and its variants were purified using a combination of Ni-NTA affinity  
685 and size exclusion chromatography steps. ER2566 (NEB) harboring pET28b-Lon  
686 plasmid was grown in LB containing 50 µg/ml kanamycin and 3% ethanol, and protein  
687 expression was induced overnight at 16 °C with 1 mM IPTG at OD<sub>600</sub> of 0.5. Cells were  
688 harvested and resuspended in purification buffer (50 mM HEPES pH 7.5, 100 mM NaCl,  
689 100 mM KCl, 25mM imidazole, 10% Glycerol). After sonication, buffer-equilibrated Ni-  
690 NTA beads were added to cleared cell lysate, incubated at 4 °C for 1 hour, and washed  
691 extensively with purification buffer. The target protein was eluted with purification buffer  
692 containing 325 mM imidazole. The protein sample was buffer exchanged to column  
693 buffer (50 mM HEPES pH 7.5, 100 mM NaCl, 100 mM KCl, 2 mM β-ME), loaded on a  
694 Sephacryl S-200 column. Fractions containing Lon were pooled, concentrated, dialyzed  
695 against protein storage buffer (50 mM HEPES pH 7.5, 100 mM NaCl, 100 mM KCl, 10%  
696 Glycerol), and stored at -80 °C. CcrM and its variants were purified similarly to Lon. The  
697 removal of 6xHis tag was performed using Thrombin CleanCleave Kit (Sigma) and  
698 verified via immunoblot using anti-His antibody.

699 **Protein *in vivo* and *in vitro* degradation assays**

700 For protein *in vivo* degradation assay, cells were grown under the desired conditions.

701 Protein synthesis was blocked by addition of 200 µg/ml chloramphenicol and 1 mg/ml

702 spectinomycin. Samples were taken at the time-points indicated in the figure and snap-

703 frozen in liquid nitrogen before immunoblot analysis.

704 *In vitro* degradation assays were performed in Lon degradation buffer (100 mM KCl, 10

705 mM MgCl<sub>2</sub>, 1 mM DTT, and 25 mM Tris-HCl [pH 8.0]) at 30 °C with an ATP-

706 regeneration system (10 U/ml rabbit muscle pyruvate kinase [or 75 µg/ml creatine

707 kinase], 20 mM phosphoenolpyruvate [or 20 mM creatine phosphate], 4 mM ATP). The

708 concentrations of Lon<sub>6</sub>, LonS674A<sub>6</sub>, LonQM<sub>6</sub>, CcrM, CcrMΔC65, CcrMS315A, or β-

709 casein were 0.2 µM, 0.2 µM, 0.2 µM, 1 µM, 1 µM, 1 µM, and 1 µM respectively.

710 Samples were taken every 30 min, quenched with SDS loading buffer, heated at 95 °C,

711 and snap-frozen in liquid nitrogen. Samples were pre-warmed at 65 °C prior to separation

712 by SDS-PAGE. The gels were stained by Coomassie blue G-250. Protein degradation

713 rates were calculated based on quantification of protein band intensity using ImageJ.

714 CcrM remaining levels over reaction time were fit to a single exponential model equation

$$Y = A_0 \times e^{-k \times X} + B$$

715 where Y is CcrM protein remaining, X is reaction time (min.), A<sub>0</sub> is the initial amount of

716 substrate (normalized to 1), k is degradation rate, and B is the fitting background. The

717 fitting parameters over DNA concentrations were listed as follows:

| DNA concentration (nM) | $k$ (min <sup>-1</sup> Lon <sub>6</sub> <sup>-1</sup> ) |
|------------------------|---------------------------------------------------------|
| 0                      | 0.0053 ± 0.0008                                         |
| 0.625                  | 0.0054 ± 0.0008                                         |
| 1.25                   | 0.0079 ± 0.0009                                         |
| 2.5                    | 0.0138 ± 0.0012                                         |
| 5                      | 0.0149 ± 0.0014                                         |
| 10                     | 0.0197 ± 0.0027                                         |
| 20                     | 0.0270 ± 0.0015                                         |
| 40                     | 0.0227 ± 0.0025                                         |

718 In Figure 5B, CcrM degradation rates over DNA concentrations were fit to an agonist-  
719 stimulated dose-response model:

$$CcrM \text{ degradation rate} = V_{min} + \frac{(V_{max} - V_{min}) \times [DNA]}{K_{activation} + [DNA]}$$

720 with fitted parameters:  $V_{min} = 0.0039 \pm 0.0016$ ,  $V_{max} = 0.0289 \pm 0.0022 \text{ min}^{-1} \text{ Lon}_6^{-1}$ ,

721  $K_{activation} = 4.391 \pm 1.609 \text{ nM}$  for DNA stimulation.

## 722 **Immunoblotting**

723 Harvested cells were suspended in SDS loading buffer and heated for 10 min at 95 °C.  
724 Equal amounts of total protein were separate on 4–15% gradient polyacrylamide gel  
725 (Bio-Rad), semi-try transferred to PVDF membrane, and probed with appropriate  
726 dilutions of primary antibody against targeted protein indicated in the figure, and a 1:  
727 10,000 dilution of secondary HRP-conjugated antibody. Washed membrane was  
728 developed using Super Signal West Pico Chemiluminescent Substrate (Thermo Scientific)  
729 and exposed to an X-ray film for visualization. The film was scanned, and the band  
730 intensity was quantified using ImageJ software.

## 731 **Quantitative reverse transcription PCR**

732 Cells grown under the desired conditions were harvested, treated with two volumes of  
733 RNa protect Bacteria Reagent (Qiagen), and snap-frozen in liquid nitrogen. The total  
734 RNA was extracted using the Qiagen RNeasy Mini Kit. Contaminated genomic DNA  
735 was removed through on-column digestion with a DNase using the Qiagen RNase-  
736 free DNase Kit. The RNA concentration was determined using a NanoDrop 2000  
737 spectrophotometer (Thermo Scientific). Reverse transcription and cDNA synthesis were  
738 performed using QuantiTect Reverse Transcription Kit. Quantitative PCRs were  
739 performed using Luna Universal qPCR Master Mix (NEB) on an Applied Biosystems  
740 7500 Fast Real-Time PCR system. The *rho* gene was used as an endogenous control. The  
741 relative fold change in target gene expression was calculated using a  $2^{-\Delta\Delta CT}$  method  
742 (Schmittgen and Livak, 2008).

## 743 **Microscopy**

744 *C. crescentus* strains grown to exponential phase ( $OD_{600} < 0.3$ ) and spotted on agarose  
745 pads (1.5%) containing M2G prior to imaging. Phase-contrast and fluorescence  
746 microscopy images were obtained using a Leica DMI8 microscope with an HC PL APO  
747 100×/1.40 oil PH3 objective, Hamamatsu electron-multiplying charge-coupled device  
748 (EMCCD) C9100 camera, and Leica Application Suit X software. For all image panels,  
749 the brightness and contrast of the images were balanced with ImageJ (NIH) to represent  
750 foci or diffuse fluorescent signal. For computational image analyses, MicrobeJ (Ducret et  
751 al., 2016) was used to determine cell outlines and lengths from phase images. Oufiti was  
752 used to determine normalized fluorescence intensities from each single cell. The data was  
753 plotted and statistically analyzed using Prism 7 (GraphPad).

## 754 **Measurement of fluorescence intensity in living cells**

755 Cells grown under the desired condition were diluted to  $OD_{600}$  of 1. A 300  $\mu$ l aliquot of  
756 cell suspension was added to the each well of a 96-well plate. The absolute fluorescence  
757 intensity was measured using Tecan Infinite M1000 plate reader at the High-Throughput  
758 Bioscience Center (HTBC), Stanford.

## 759 ***In vitro* DNA methylation and ATPase assays**

760 Probe 1 was amplified from NA1000 genome using primer pair probe1-F/probe1-R.  
761 Probe 2 was generated by double-joint PCR, using Probe 1 as a template. Two resultant  
762 fragments amplified by primer pairs probe1-F/probe1-RMu and probe1-FMu/probe1-R  
763 were jointed using the second-round of PCR with primer pair probe1-F/probe1-R. Probe  
764 3 was amplified from NA1000 genome using primer pair probe3-F2/probe3-R2. To  
765 prepare fully methylated DNA probe, 20 nM Probe 1 was incubated with 420 nM CcrM  
766 and 80  $\mu$ M S-adenosyl-methionine (SAM) at 30 °C for 1 hour in DNA methylation buffer  
767 (50 mM Tris-HCl [pH 7.5], 5 mM  $\beta$ -ME, 10 mM EDTA). The resultant DNA probe was  
768 precipitated with 100% ethanol, washed twice with 70% ethanol, dried in speed-vac, and  
769 re-dissolved in distilled-water. To prepare hemi-methylated Probe 1, an equal amount of  
770 fully methylated and unmethylated Probe 1 was mixed in a PCR tube. The denature and  
771 annealing were performed on a thermocycler with 3 min at 95 °C following 3 min at 70



772 °C for 5 cycles. The resultant DNA probe was precipitated with 100% ethanol, dried in  
773 speed-vac, and re-dissolved in distilled-water. The methylation state of probe was  
774 assayed by restriction digestion using *HinfI* or *HphI*. Lon ATPase activity was assayed  
775 using ATPase/GTPase Activity Assay Kit (Sigma).

#### 776 **Bacterial-two hybrid**

777 The bacterial adenylate cyclase two-hybrid system was used to test protein interactions  
778 (Karimova et al., 1998). Briefly, genes of interest were fused to the N- or C-terminal of  
779 T18 or T25 fragments in the pUT18C pUT18C, pKT25, or pKNT25 vectors. The  
780 resultant plasmids were co-introduced into BTH101 strain. The transformants were re-  
781 streaked on MacConkey agar (40 g/L) plates supplemented with maltose (1%), IPTG (1  
782 mM), and appropriate antibiotics. Plates were incubated at 30°C for 3 days before  
783 photography.

#### 784 **Microscale thermophoresis (MST)**

785 Fluorescent labeling of lysine residues in LonS674A was accomplished by incubating  
786 each protein with an N-hydroxysuccinimide (NHS) ester conjugated to Atto-488 (Sigma-  
787 Aldrich). The dye-conjugate was dissolved in dry DMSO to make a 1 mM solution. The  
788 conjugation reaction was performed in the dark using 1-2 mg/mL protein and a 3-fold  
789 molar ratio of dye to protein at room temperature, with gentle shaking. Unconjugated  
790 dye was removed through dialysis against the protein storage buffer. Direct binding  
791 between fluorescently labeled LonS674A and CcrM or Probe 1 was probed via  
792 microscale thermophoresis (NanoTemper Technologies) (Wienken et al., 2010). For each  
793 binding experiment, a twofold serial dilution was made for CcrM or Probe 1 in protein  
794 storage buffer with 0.025% Tween-20 and 10 mM MgCl<sub>2</sub>. Fluorescently labeled  
795 LonS674A was then added at 25 nM, mixed, and incubated at room temperature for 10  
796 minutes, covered, in the dark. The protein mixtures were loaded into Standard Treated  
797 capillaries (NanoTemper). Binding was assessed using the following instrument settings:  
798 70% blue LED power, 40% IR-laser power, 30 second IR heating period, 5 second  
799 recovery.



800 Binding data were initially fit in MO.Affinity Analysis (NanoTemper), and the binding  
801 curve plateau data were exported. Experimental replicates were averaged in Prism 7  
802 (GraphPad) and according to the law of mass action, as described:

803

$$\frac{BL}{B_0} = \frac{([L_0] + [B_0] + K_d) - \sqrt{([L_0] + [B_0] + K_d)^2 - 4 * [L_0] * [B_0]}}{2[B_0]}$$

804

805 In this equation, BL represents the concentration of protein complexes,  $[B_0]$  represents  
806 total binding sites of the fluorescent ligand,  $[L_0]$  represents the amount of added ligand,  
807 and  $K_d$  represents the dissociation constant.

### 808 **Electrophoretic mobility shift assay (EMSA)**

809 DNA-binding capacity of CcrM was evaluated by incubation of purified CcrM with 20  
810 nM of DNA probe indicated in the figure in the presence of 200  $\mu$ M sinefungin in EMSA  
811 buffer (50 mM HEPES pH 7.0, 200 mM NaCl, 1 mM EDTA, 1 mM DTT) for 30 min at  
812 room temperature and subjected to electrophoresis in a 4–15% Mini-PROTEAN®  
813 TGX™ Precast Protein Gels (Bio-Rad) at constant 80 V for 3 hours at 4°C in 1× Tris  
814 glycine native gel buffer (25 mM Tris base, 192 mM glycine). Lon DNA binding  
815 capacity was assayed similarly to CcrM, except that 10 mM  $MgCl_2$  was added instead of  
816 200  $\mu$ M sinefungin. Protein concentrations were 0  $\mu$ M, 2  $\mu$ M, 4  $\mu$ M, 6  $\mu$ M, 8  $\mu$ M, 10  $\mu$ M,  
817 12  $\mu$ M for CcrM and 0 nM, 50 nM, 100 nM, 150 nM, 200 nM, 250 nM for Lon<sub>6</sub>,  
818 respectively. The protein-DNA complexes were stained with ethidium bromide and  
819 imaged with a Bio-Rad ChemiDoc XRS+ system.

### 820 ***In vitro* Ni-NTA pull-down assay**

821 Purified LonS674A<sub>6</sub> (0.2  $\mu$ M) was incubated with 20 nM Probe 1 and 200  $\mu$ l buffer-  
822 equilibrated Ni-NTA beads at room temperature for 30 min in PD buffer (protein storage  
823 buffer containing 10 mM  $MgCl_2$ ). One unit of DNase I was added when necessary to  
824 cleavage Probe 1. The beads were washed once with 1 ml PD buffer and resuspended in  
825 another 200  $\mu$ l PD buffer containing a low amount of CcrM (0.4  $\mu$ M) or high amount of  
826 CcrM (4  $\mu$ M). A 20  $\mu$ l aliquot of reaction (input) was taken, suspended in SDS loading

827 buffer, boiled for 10 min followed by incubation at 65 °C for 5 min, and subjected to  
828 analyses by SDS-PAGE and 1% agarose gel. The content of remaining reaction was  
829 incubated at room temperature for 1 hour, washed with PD buffer extensively, and eluted  
830 with 100 µl PD buffer containing 325 mM imidazole. The eluted protein samples were  
831 analyzed by SDS-PAGE for detection of the presences of LonS674A<sub>6</sub>-CcrM-DNA  
832 nucleoprotein complex via silver staining.

### 833 **Reference**

- 834 Berdis, A.J., Lee, I., Coward, J.K., Stephens, C., Wright, R., Shapiro, L., and Benkovic,  
835 S.J. (1998). A cell cycle-regulated adenine DNA methyltransferase from *Caulobacter*  
836 *crescentus* processively methylates GANTC sites on hemimethylated DNA. *Proc. Natl.*  
837 *Acad. Sci.* 95.
- 838 Bergé, M., and Viollier, P.H. (2017). End-in-Sight: Cell Polarization by the Polygenic  
839 Organizer PopZ. *Trends Microbiol.* 0.
- 840 Bickle, T.A., and Krüger, D.H. (1993). Biology of DNA restriction. *Microbiol. Rev.* 57,  
841 434–450.
- 842 Botos, I., Melnikov, E.E., Cherry, S., Tropea, J.E., Khalatova, A.G., Rasulova, F., Dauter,  
843 Z., Maurizi, M.R., Rotanova, T. V, Wlodawer, A., et al. (2004). The catalytic domain of  
844 *Escherichia coli* Lon protease has a unique fold and a Ser-Lys dyad in the active site. *J.*  
845 *Biol. Chem.* 279, 8140–8148.
- 846 Bowman, G.R., Comolli, L.R., Zhu, J., Eckart, M., Koenig, M., Downing, K.H., Moerner,  
847 W.E., Earnest, T., and Shapiro, L. (2008). A Polymeric Protein Anchors the  
848 Chromosomal Origin/ParB Complex at a Bacterial Cell Pole. *Cell* 134, 945–955.
- 849 Breidenstein, E.B.M., Bains, M., and Hancock, R.E.W. (2012). Involvement of the lon  
850 protease in the SOS response triggered by ciprofloxacin in *Pseudomonas aeruginosa*  
851 PAO1. *Antimicrob. Agents Chemother.* 56, 2879–2887.
- 852 Casadesús, J., and Low, D. (2006). Epigenetic gene regulation in the bacterial world.  
853 *Microbiol. Mol. Biol. Rev.* 70, 830–856.
- 854 Charette, M.F., Henderson, G.W., Doane, L.L., and Markovitz, A. (1984). DNA-

- 855 stimulated ATPase activity on the lon (CapR) protein. *J. Bacteriol.* *158*, 195–201.
- 856 Chung, C.H., and Goldberg, A.L. (1982). DNA stimulates ATP-dependent proteolysis  
857 and protein-dependent ATPase activity of protease La from *Escherichia coli*. *Proc. Natl.*  
858 *Acad. Sci. U. S. A.* *79*, 795–799.
- 859 Collier, J. (2009). Epigenetic regulation of the bacterial cell cycle. *Curr. Opin. Microbiol.*  
860 *12*, 722–729.
- 861 Collier, J., McAdams, H.H., and Shapiro, L. (2007). A DNA methylation ratchet governs  
862 progression through a bacterial cell cycle. *Proc. Natl. Acad. Sci. U. S. A.* *104*, 17111–  
863 17116.
- 864 Cremers, C.M., and Jakob, U. (2013). Oxidant sensing by reversible disulfide bond  
865 formation. *J. Biol. Chem.* *288*, 26489–26496.
- 866 Ducret, A., Quardokus, E.M., and Brun, Y. V. (2016). MicrobeJ, a tool for high  
867 throughput bacterial cell detection and quantitative analysis. *Nat. Microbiol.* *1*, 16077.
- 868 Ebersbach, G., Briegel, A., Jensen, G.J., and Jacobs-Wagner, C. (2008). A self-  
869 associating protein critical for chromosome attachment, division, and polar organization  
870 in *caulobacter*. *Cell* *134*, 956–968.
- 871 Goemans, C. V, Beaufay, F., Wahni, K., Van Molle, I., Messens, J., and Collet, J.F.  
872 (2018). An essential thioredoxin is involved in the control of the cell cycle in the  
873 bacterium *Caulobacter crescentus*. *J. Biol. Chem.* jbc.RA117.001042.
- 874 Gonzalez, D., Kozdon, J.B., McAdams, H.H., Shapiro, L., and Collier, J. (2014). The  
875 functions of DNA methylation by CcrM in *Caulobacter crescentus*: a global approach.  
876 *Nucleic Acids Res.* *42*, 3720–3735.
- 877 Gora, K.G., Cantin, A., Wohlever, M., Joshi, K.K., Perchuk, B.S., Chien, P., and Laub,  
878 M.T. (2013). Regulated proteolysis of a transcription factor complex is critical to cell  
879 cycle progression in *Caulobacter crescentus*. *Mol. Microbiol.* *87*, 1277–1289.
- 880 Gur, E., and Sauer, R.T. (2008). Recognition of misfolded proteins by Lon, a AAA+  
881 protease. *Genes Dev.* *22*, 2267–2277.
- 882 Gur, E., and Sauer, R.T. (2009). Degrons in protein substrates program the speed and

- 883 operating efficiency of the AAA+ Lon proteolytic machine. *Proc. Natl. Acad. Sci. U. S.*  
884 *A. 106*, 18503–18508.
- 885 Haakonsen, D.L., Yuan, A.H., and Laub, M.T. (2015). The bacterial cell cycle regulator  
886 GcrA is a  $\sigma$ 70 cofactor that drives gene expression from a subset of methylated promoters.  
887 *Genes Dev. 29*, 2272–2286.
- 888 He, X.-J., Chen, T., and Zhu, J.-K. (2011). Regulation and function of DNA methylation  
889 in plants and animals. *Cell Res. 21*, 442–465.
- 890 Holmes, J.A., Follett, S.E., Wang, H., Meadows, C.P., Varga, K., and Bowman, G.R.  
891 (2016). *Caulobacter* PopZ forms an intrinsically disordered hub in organizing bacterial  
892 cell poles. *Proc. Natl. Acad. Sci. U. S. A. 113*, 12490–12495.
- 893 Hottes, A.K., Shapiro, L., and McAdams, H.H. (2005). DnaA coordinates replication  
894 initiation and cell cycle transcription in *Caulobacter crescentus*. *Mol. Microbiol. 58*,  
895 1340–1353.
- 896 Huitema, E., Pritchard, S., Matteson, D., Radhakrishnan, S.K., and Viollier, P.H. (2006).  
897 Bacterial Birth Scar Proteins Mark Future Flagellum Assembly Site. *Cell 124*, 1025–  
898 1037.
- 899 Iyer, R.R., Pluciennik, A., Burdett, V., and Modrich, P.L. (2006). DNA Mismatch  
900 Repair: □ Functions and Mechanisms. *Chem. Rev. 106*, 302–323.
- 901 Jiang, C., Brown, P.J.B., Ducret, A., and Brun, Y. V. (2014). Sequential evolution of  
902 bacterial morphology by co-option of a developmental regulator. *Nature 506*, 489–493.
- 903 Jonas, K., Liu, J., Chien, P., and Laub, M.T. (2013). Proteotoxic stress induces a cell-  
904 cycle arrest by stimulating Lon to degrade the replication initiator DnaA. *Cell 154*, 623–  
905 636.
- 906 Joshi, K.K., and Chien, P. (2016). Regulated Proteolysis in Bacteria: *Caulobacter*. *Annu.*  
907 *Rev. Genet. 50*, 423–445.
- 908 Karimova, G., Pidoux, J., Ullmann, A., and Ladant, D. (1998). A bacterial two-hybrid  
909 system based on a reconstituted signal transduction pathway. *Proc. Natl. Acad. Sci. U. S.*  
910 *A. 95*, 5752–5756.

- 911 Karłowicz, A., Wegrzyn, K., Gross, M., Kaczynska, D., Ropelewska, M., Siemiątkowska,  
912 M., Bujnicki, J.M., and Konieczny, I. (2017). Defining the crucial domain and amino acid  
913 residues in bacterial Lon protease for DNA binding and processing of DNA-interacting  
914 substrates. *J. Biol. Chem.* *292*, 7507–7518.
- 915 Kim, M.Y., and Zilberman, D. (2014). DNA methylation as a system of plant genomic  
916 immunity. *Trends Plant Sci.* *19*, 320–326.
- 917 Kozdon, J.B., Melfi, M.D., Luong, K., Clark, T.A., Boitano, M., Wang, S., Zhou, B.,  
918 Gonzalez, D., Collier, J., Turner, S.W., et al. (2013). Global methylation state at base-pair  
919 resolution of the *Caulobacter* genome throughout the cell cycle. *Proc. Natl. Acad. Sci. U.*  
920 *S. A.* *110*, E4658-67.
- 921 Laloux, G., Jacobs-Wagner, C., Gounon, P., Ohayon, H., and Cossart, P. (2014). How do  
922 bacteria localize proteins to the cell pole? *J. Cell Sci.* *127*, 11–19.
- 923 Lam, H., Schofield, W.B., and Jacobs-Wagner, C. (2006). A landmark protein essential  
924 for establishing and perpetuating the polarity of a bacterial cell. *Cell* *124*, 1011–1023.
- 925 Lasker, K., Diezmann, A. von, Ahrens, D.G., Mann, T.H., Moerner, W.E., and Shapiro, L.  
926 (2017). Phospho-signal flow from a pole-localized microdomain spatially patterns  
927 transcription factor activity. *bioRxiv* 220293.
- 928 Lister, R., Pelizzola, M., Downen, R.H., Hawkins, R.D., Hon, G., Tonti-Filippini, J., Nery,  
929 J.R., Lee, L., Ye, Z., Ngo, Q.-M., et al. (2009). Human DNA methylomes at base  
930 resolution show widespread epigenomic differences. *Nature* *462*, 315–322.
- 931 Marczyński, G.T., and Shapiro, L. (2002). Control of Chromosome Replication in  
932 *Caulobacter Crescentus*. *Annu. Rev. Microbiol.* *56*, 625–656.
- 933 Matsui, H., Suzuki, M., Isshiki, Y., Kodama, C., Eguchi, M., Kikuchi, Y., Motokawa, K.,  
934 Takaya, A., Tomoyasu, T., and Yamamoto, T. (2003). Oral immunization with ATP-  
935 dependent protease-deficient mutants protects mice against subsequent oral challenge  
936 with virulent *Salmonella enterica* serovar typhimurium. *Infect. Immun.* *71*, 30–39.
- 937 Mou, Z., Fan, W., and Dong, X. (2003). Inducers of plant systemic acquired resistance  
938 regulate NPR1 function through redox changes. *Cell* *113*, 935–944.

- 939 Mukherjee, S., Bree, A.C., Liu, J., Patrick, J.E., Chien, P., and Kearns, D.B. (2015).  
940 Adaptor-mediated Lon proteolysis restricts *Bacillus subtilis* hyperflagellation. *Proc. Natl.*  
941 *Acad. Sci. U. S. A.* *112*, 250–255.
- 942 Narayanan, S., Janakiraman, B., Kumar, L., and Radhakrishnan, S.K. (2015). A cell  
943 cycle-controlled redox switch regulates the topoisomerase IV activity. *Genes Dev.* *29*,  
944 1175–1187.
- 945 Perez, A.M., Mann, T.H., Lasker, K., Ahrens, D.G., Eckart, M.R., and Shapiro, L. (2017).  
946 A Localized Complex of Two Protein Oligomers Controls the Orientation of Cell Polarity.  
947 *MBio* *8*, e02238-16.
- 948 Pinti, M., Gibellini, L., Nasi, M., De Biasi, S., Bortolotti, C.A., Iannone, A., and  
949 Cossarizza, A. (2016). Emerging role of Lon protease as a master regulator of  
950 mitochondrial functions. *Biochim. Biophys. Acta - Bioenerg.* *1857*, 1300–1306.
- 951 Ptacin, J.L., Lee, S.F., Garner, E.C., Toro, E., Eckart, M., Comolli, L.R., Moerner, W.E.,  
952 and Shapiro, L. (2010). A spindle-like apparatus guides bacterial chromosome  
953 segregation. *Nat. Cell Biol.* *12*, 791–798.
- 954 Puri, N., and Karzai, A.W. (2017). HspQ Functions as a Unique Specificity-Enhancing  
955 Factor for the AAA+ Lon Protease. *Mol. Cell* *66*, 672–683.e4.
- 956 Reisenauer, A., and Shapiro, L. (2002). DNA methylation affects the cell cycle  
957 transcription of the CtrA global regulator in *Caulobacter*. *EMBO J.* *21*, 4969–4977.
- 958 Reisenauer, A., Kahng, L.S., McCollum, S., and Shapiro, L. (1999). Bacterial DNA  
959 methylation: a cell cycle regulator? *J. Bacteriol.* *181*, 5135–5139.
- 960 Rogers, A., Townsley, L., Gallego-Hernandez, A.L., Beyhan, S., Kwuan, L., and Yildiz,  
961 F.H. (2016). The LonA Protease Regulates Biofilm Formation, Motility, Virulence, and  
962 the Type VI Secretion System in *Vibrio cholerae*. *J. Bacteriol.* *198*, 973–985.
- 963 Rudner, D.Z., and Losick, R. (2010). Protein subcellular localization in bacteria. *Cold*  
964 *Spring Harb. Perspect. Biol.* *2*, a000307.
- 965 Sánchez-Romero, M.A., Cota, I., and Casadesús, J. (2015). DNA methylation in bacteria:  
966 from the methyl group to the methylome. *Curr. Opin. Microbiol.* *25*, 9–16.

- 967 Sauer, R.T., and Baker, T.A. (2011). AAA+ Proteases: ATP-Fueled Machines of Protein  
968 Destruction. *Annu. Rev. Biochem.* *80*, 587–612.
- 969 Schmittgen, T.D., and Livak, K.J. (2008). Analyzing real-time PCR data by the  
970 comparative CT method. *Nat. Protoc.* *3*, 1101–1108.
- 971 Schrader, J.M., and Shapiro, L. (2015). Synchronization of *Caulobacter*  
972 *Crescentus* for Investigation of the Bacterial Cell Cycle. *J. Vis. Exp.*
- 973 Schrader, J.M., Li, G.-W., Childers, W.S., Perez, A.M., Weissman, J.S., Shapiro, L., and  
974 McAdams, H.H. (2016). Dynamic translation regulation in *Caulobacter* cell cycle control.  
975 *Proc. Natl. Acad. Sci. U. S. A.* *113*, E6859–E6867.
- 976 Smith, Z.D., and Meissner, A. (2013). DNA methylation: roles in mammalian  
977 development. *Nat. Rev. Genet.* *14*, 204–220.
- 978 Val, M.-E., Skovgaard, O., Ducos-Galand, M., Bland, M.J., and Mazel, D. (2012).  
979 Genome Engineering in *Vibrio cholerae*: A Feasible Approach to Address Biological  
980 Issues. *PLoS Genet.* *8*, e1002472.
- 981 Ward, D., and Newton, A. (1997). Requirement of topoisomerase IV *parC* and *parE*  
982 genes for cell cycle progression and developmental regulation in *Caulobacter crescentus*.  
983 *Mol. Microbiol.* *26*, 897–910.
- 984 Wienken, C.J., Baaske, P., Rothbauer, U., Braun, D., and Duhr, S. (2010). Protein-  
985 binding assays in biological liquids using microscale thermophoresis. *Nat. Commun.* *1*,  
986 100.
- 987 Woodcock, C.B., Yakubov, A.B., and Reich, N.O. (2017). *Caulobacter crescentus* Cell  
988 Cycle-Regulated DNA Methyltransferase Uses a Novel Mechanism for Substrate  
989 Recognition. *Biochemistry* *56*, 3913–3922.
- 990 Wright, R., Stephens, C., Zweiger, G., Shapiro, L., and Alley, M.R. (1996). *Caulobacter*  
991 *Lon* protease has a critical role in cell-cycle control of DNA methylation. *Genes Dev.* *10*,  
992 1532–1542.
- 993 Zehnbaauer, B.A., Foley, E.C., Henderson, G.W., and Markovitz, A. (1981). Identification  
994 and purification of the *Lon*<sup>+</sup> (*capR*<sup>+</sup>) gene product, a DNA-binding protein. *Proc. Natl.*



995 Acad. Sci. U. S. A. 78, 2043–2047.  
996 Zhou, B., Schrader, J.M., Kalogeraki, V.S., Abeliuk, E., Dinh, C.B., Pham, J.Q., Cui,  
997 Z.Z., Dill, D.L., McAdams, H.H., and Shapiro, L. (2015). The Global Regulatory  
998 Architecture of Transcription during the *Caulobacter* Cell Cycle. *PLoS Genet.* 11,  
999 e1004831.  
1000 Zweiger, G., Marczyński, G., and Shapiro, L. (1994). A *Caulobacter* DNA  
1001 Methyltransferase that Functions only in the Predivisinal Cell. *J. Mol. Biol.* 235, 472–  
1002 485.

### 1003 **Author contributions**

1004 X.Z. and L.S. initiated the study. X.Z. designed and performed experiments, performed  
1005 data analysis. X.Z. and L.S. wrote the paper.

### 1006 **Acknowledgement**

1007 We thank all members of the Shapiro lab for helpful discussions throughout the project,  
1008 Drs. Thomas H. Mann, Jonathan Herrmann, Saumya Saurabh and Darshankumar T.  
1009 Pathak for their critical reading of the manuscript, and Dr. Jinfan Wang for help on  
1010 modelling protein degradation data. We acknowledge support from NIGMS NIH R35-  
1011 GM118071 [to L.S.]. L.S. is a Chan Zuckerberg Biohub Investigator.

### 1012 **Figure legends**

1013 **Figure 1. CcrM-mediated DNA methylation regulates the cell cycle control circuit**  
1014 **by linking the progression of the cell cycle to chromosome replication.**

1015 (A) Schematic of the *Caulobacter* cell cycle. Stages of the *Caulobacter* cell cycle are  
1016 shown in 30 min intervals, beginning with the swarmer progeny (SWP) at 0 min.  
1017 Swarmer cells (G1 phase) develop into stalked cells (ST) and enter an S phase. As stalked  
1018 cells elongate and become pre-divisinal cells (PD), CcrM (green) is synthesized. The  
1019 pre-divisinal cells begin compartmentalization (G2 phase), yielding two  
1020 morphologically distinct daughter swarmer (SWP) and stalked (STP) cells. The temporal  
1021 distribution of global regulators, DnaA (blue), GcrA (yellow), and CtrA (red), are shown.



1022 (B) Schematic showing the changes in the methylation state of GANTC motifs on the  
1023 chromosome as a function of chromosome replication and cell cycle progression. The  
1024 locus of *dnaA* (blue), *gcrA* (yellow), *ctrA* (red), and *ccrM* (green) and their corresponding  
1025 methylation states are indicated.

1026 (C) CcrM plays a central role in the regulation of a cyclical genetic circuit driving  
1027 *Caulobacter* cell cycle. The asterisk indicates fully methylated GANTC site.

1028 **Figure 2. The C-terminus of CcrM is necessary for recognition by Lon and for DNA**  
1029 **methyltransferase activity.**

1030 (A) Cells containing a single copy of M2-CcrM or CcrM-M2 under the control of native  
1031 promotor were grown in M2G, synchronized, and released onto fresh M2G. Samples  
1032 were taken every 20 min for immunoblots with anti-CcrM antibody.

1033 (B) Schematic representation of CcrM domain structure and YFP chimeric constructs  
1034 used in this study. Dash line indicates a deletion of amino acids. The numbers refer to  
1035 amino acid positions.

1036 (C) *In vivo* degradation assays showing the effect of C-terminal 65 residues on CcrM  
1037 protein stability. Stabilities of YFP chimeric proteins in  $\Delta lon$  (- *lon*) cells are shown for  
1038 comparison. Cells were grown in PYE with 0.3% xylose to exponential phase and treated  
1039 with antibiotics for protein synthesis shut-off assays. Protein levels were monitored by  
1040 immunoblot using anti-GFP antibody (top). Band intensities were quantified (bottom) and  
1041 error bars represent SDs ( $n = 3$ ).

1042 (D) Florescence of wild-type (+ *lon*) and  $\Delta lon$  (- *lon*) harboring plasmids expressing  
1043 chimeric YFP proteins. A schematic shows a series of truncations in which 8, 10, 15, 20,  
1044 22, 23, 24, 26, 28, and 30 amino acids are retained from CcrM C-terminal 65 amino acids  
1045 (top). The florescence normalized by optical density is shown (bottom). The means  $\pm$   
1046 SDs ( $n = 3$ ) are plotted. CK, cells expressing free YFP. EV, cells expressing YFP-  
1047 CcrM65C.

1048 (E) DNA methylation assay showing the effect of CcrM C-terminal domain on its DNA  
1049 methyltransferase activity. A schematic of Probe 1 designing strategy is shown (top). PCR  
1050 amplified Probe 1 was incubated with CcrM or CcrM $\Delta$ C65 in the presence of S-adenosyl

1051 methionine (SAM). DNA methylation states were assayed by *Hinf*I digestion (bottom).  
1052 Dam methylase from *E. coli* served as a negative control. P1 and P2 are primers for Probe  
1053 1 amplification.

1054 **Figure 3. Lon is a DNA-binding protein and its proteolytic activity is constitutively**  
1055 **active during *Caulobacter* cell cycle.**

1056 (A) *In vivo* degradation assays showing stabilities of YFP and YFP-sul20C in wild-type.  
1057 YFP-sul20C stability in  $\Delta lon$  cells is shown for comparison. Merodiploid cells expressing  
1058 free YFP or YFP-sul20C were grown in PYE with 0.3% xylose to exponential phase and  
1059 treated with antibiotics for protein synthesis shut-off assays. Protein levels were  
1060 monitored by immunoblot using anti-GFP antibody (top). Band intensities were  
1061 quantified and indicated as percentage. The cellular fluorescent intensity normalized by  
1062 optical density is measured (bottom). The means  $\pm$  SDs ( $n = 4$ ) are plotted.

1063 (B) *In vivo* degradation assays showing YFP-sul20C stabilities in swarmer, stalked, and  
1064 pre-divisional cell. Cells expressing YFP-sul20C controlled by  $P_{xyl}$  were grown in M2G  
1065 with 0.3% xylose, synchronized, and harvested at 0, 60, and 120 mps. Samples were  
1066 treated with antibiotics for protein synthesis shut-off assays. Protein levels were  
1067 monitored by immunoblot using anti-GFP antibody (top). Band intensities were  
1068 quantified (bottom) and error bars represent SDs ( $n = 3$ ).

1069 (C) Fluorescence images showing Lon-YFP colocalizing with DAPI-stained DNA in a  
1070 *Caulobacter* temperature-sensitive *parE* and *ftsA* mutant (PC6340) that produces DNA-  
1071 free regions. LonQM-YFP lacking DNA binding activity is shown for comparison. Cells  
1072 were cultured at the restrictive temperature (37°C) for 10h in M2G medium with 0.3%  
1073 xylose prior to DAPI staining and imaging (top). Scale bar = 5  $\mu$ m. Fluorescence  
1074 intensity profiles of Lon-YFP or LonQM-YFP and DAPI signals along the long axis of  
1075 the cell are shown (bottom). Red arrows indicate DNA-free regions.

1076 **Figure 4. CcrM binds DNA probes *in vitro* with high affinity.**

1077 (A) Schematic view of DNA probe designs according to genome locus. Probe 2 is  
1078 designed based on Probe 1 with mutation of GATTC to AATAC. Probe 3 is designed

1079 from the upstream sequence of *pliA*. P1-P2 and P3-P4 are primers to amplify Probe 1 or 2  
1080 and Probe 3, respectively. CcrM methylation sites are shown.

1081 (B) EMSA showing binding of recombinant CcrM, CcrM $\Delta$ C65, or Lon to Probe 1, 2, and  
1082 3, respectively. See Methods for experimental details.

1083 (C-D) The direct binding of purified LonS674A to CcrM or Probe 1 was assessed *in*  
1084 *vitro* by microscale thermophoresis. LonS674A was fluorescently labeled with Atto-488  
1085 dye, indicated by LonS674A\*. The concentration of LonS674A\* was held constant at  
1086 20 nM while CcrM (C) or Probe 1 (D) was titrated in 2-fold serial dilutions against it.  
1087 The purified proteins were allowed to incubate together at room temperature for 10 min  
1088 prior to the binding assay. The data report the fraction of LonS674A\* that is bound at  
1089 each concentration of CcrM (C) or Probe 1 (D). See Methods for description of curve fits.

1090 (E) Cartoon depicting affinities measured in Figure 4C and 4D between CcrM, Lon, and  
1091 DNA. CcrM and Lon have affinities to DNA ~14 folds more than that of CcrM-Lon  
1092 direct interaction.

1093 **Figure 5. DNA serves as an adaptor for Lon-mediated CcrM proteolysis.**

1094 (A) *In vitro* degradation assays showing the stimulatory effect of DNA on CcrM  
1095 degradation by Lon. CcrM (1  $\mu$ M) was incubated with Lon<sub>6</sub> (0.2  $\mu$ M) in the absence or  
1096 presence of DNA probes (10 nM). Degradation of CcrM $\Delta$ C65 was also assayed in the  
1097 presence or absence of DNA probe as indicated. The intensity of CcrM or CcrM $\Delta$ C65  
1098 bands from three independent experiments were quantified and plotted.

1099 (B) DNA-facilitated CcrM degradation by Lon. Degradation rates of CcrM (1  $\mu$ M) by  
1100 Lon (0.2  $\mu$ M) are shown for increasing concentration of DNA probe. See Methods for  
1101 description of curve fits.

1102 (C) ATPase activity of Lon in presence and absence of DNA and CcrM. See Methods for  
1103 detailed description of ATPase assay.

1104 (D) *In vitro* degradation assays showing the degradation of CcrMS315A by Lon and the  
1105 degradation of CcrM by LonQM. CcrMS315A or CcrM (1  $\mu$ M) was incubated with Lon  
1106 or LonQM<sub>6</sub> (0.2  $\mu$ M) in the absence of Probe 1 (10 nM). Pyruvate kinase is part of the  
1107 ATP regeneration system.

1108 (E) DNA facilitates recognition of CcrM by LonS674A in a low concentration.  
1109 Coomassie-stained SDS-PAGE gels showing co-immunoprecipitation of nucleoprotein  
1110 complex. The concentration of LonS674A<sub>6</sub> was maintained at 0.2 μM. A low  
1111 concentration of CcrM (0.4 μM) requires the presence of DNA to be recognized by  
1112 LonS674A (left), whereas the recognition of a high concentration of CcrM (4 μM) does  
1113 not depend on the presence of DNA (right). Asterisks indicate DNase I digestion before  
1114 elution.

1115 (F) Cartoon depicting DNA-facilitated CcrM degradation by Lon. The left panel shows  
1116 the presence of CcrM, Lon, and DNA fragments in a mixed reaction. A zoomed-in  
1117 schematic view (right panel) shows the three steps of CcrM degradation by Lon on DNA:  
1118 (1) preferential binding of CcrM and Lon to DNA fragments due to their individual high  
1119 affinity; (2) enhanced-intermolecular collision frequency driven by CcrM processivity; (3)  
1120 substrate unfolding and proteolysis. DNA plays dual roles in modulating CcrM-mediated  
1121 adenine methylation and CcrM degradation by Lon.

1122 **Figure 6. CcrM is dynamically sequestered at the flagellated cell pole of the stalked**  
1123 **cell during stalked cell cycle.**

1124 (A) Cells expressing single chromosomal copy of YFP-CcrM under the control of CcrM  
1125 native promotor were grown in M2G to exponential phase and imaged by phase contrast  
1126 and epifluorescence microscopy (upper left, Scale bar = 5 μm). Cells co-expressing YFP-  
1127 CcrM and SpmX-mCherry under the control of their native promotors were grown in  
1128 M2G to exponential phase and imaged by phase contrast and epifluorescence microscopy  
1129 (lower left). A representative cell overlaid with phase, YFP, and mCherry channels is  
1130 shown (Scale bar = 1 μm). A florescent profile is shown by an alignment of 103 cells  
1131 with their fluorescent channels of pole marker SpmX-mCherry and YFP-CcrM. The  
1132 table shows the distribution of CcrM localizations in examined 444 cells (right).

1133 (B) Time-lapse microscopy of cells producing chromosome-encoded YFP-CcrM under  
1134 the control of its native promotor. Images of the cells were taken every 15 min. Scale bar  
1135 = 5 μm.

1136 (C) and (D) Time-lapse microscopy of cells co-expressing chromosome-encoded YFP-  
1137 CcrM and TipN-GFP (D) or ParB-mCheery (E) under the control of their native  
1138 promoters. Images of the cells were taken every 10 min. Scale bar = 5  $\mu$ m.

1139 (E) Cartoon depicting dynamic distribution of CcrM between swarmer and stalked cell  
1140 cycle. CcrM protein abundance reaches the highest level in pre-divisional cell. Upon cell  
1141 division, Swarmer (SW) daughter cell is subjected to the developmental program while  
1142 stalked (ST) daughter cell begins chromosomal replication and cell growth immediately,  
1143 giving raise to distinct swarmer and stalked cell cycle. In daughter swarmer cell, CcrM is  
1144 degraded completely during swarmer to stalked cell transition. In daughter stalked cell,  
1145 however, newly synthesized chromosomal DNA requires robust clearance of CcrM  
1146 protein to maintain its hemi-methylated state, which cannot be achieved by proteolysis in  
1147 a short time window. CcrM starts sequestration at the new pole when chromosomal  
1148 replication initiated. Sequestered CcrM releases from the pole prior to the formation of  
1149 division plane, meanwhile TipN is re-localized to the membrane throughout the cell.

1150 **Figure 7. CcrM is stabilized by polar sequestration.**

1151 (A) Immunoblots of protein samples from synchronized wild-type cultures using anti-  
1152 CcrM antibody. Swarmer cells collected from the first synchronization were released into  
1153 M2G medium allowing for cell cycle progression, harvested at 160 mps, and subjected to  
1154 the second-synchronization. The swarmer and stalked cell fractions collected from the  
1155 second synchronization were released in M2G for swarmer and stalked cell cycle  
1156 analyses, respectively.

1157 (B) Immunoblots of protein samples from synchronized cells expressing YFP-CcrM  
1158 under the control of  $P_{xyt}$ . Merodiploid strains expressing YFP-CcrM in the background of  
1159 wild-type (+ *lon*) or  $\Delta lon$  (- *lon*) were grown in M2G with 0.3% xylose, synchronized  
1160 and released into M2G with 0.3% xylose for cell cycle progression. Samples were taken  
1161 every 20 min and protein levels were monitored by immunoblot using anti-GFP antibody  
1162 (top). Band intensities were quantified (middle) and error bars represent SDs ( $n = 3$ ).  
1163 YFP-CcrM mRNA levels from each sample were normalized by qRT-PCR (bottom). The  
1164 means  $\pm$  SDs ( $n = 3$ ) are plotted.

1165 (C) *In vivo* degradation assays showing YFP-CcrM stabilities in swarmer, stalked, and  
1166 pre-divisional cell. YFP-CcrM stabilities in  $\Delta lon$  (- *lon*) are shown for comparison.  
1167 Merodiploid strains expressing YFP-CcrM controlled by  $P_{xyl}$  were grown in M2G with  
1168 0.3% xylose, synchronized, and harvested at 0, 60, and 120 mps. Samples were treated  
1169 with antibiotics for protein synthesis shut-off assays. Protein levels were monitored by  
1170 immunoblot using anti-GFP antibody (top). Band intensities were quantified (bottom)  
1171 and error bars represent SDs ( $n = 3$ ).

1172 (D) Cartoon depicting CcrM protein synthesis, stability and abundance between swarmer  
1173 and stalked cell cycle. CcrM protein level reaches the highest point in pre-divisional cell.  
1174 Meanwhile, CcrM starts proteolysis by Lon in a DNA-facilitated manner. Upon cell  
1175 division, distinct CcrM protein turnover discriminates swarmer and stalked cell cycle. In  
1176 swarmer cell cycle, remaining CcrM inherited from pre-divisional cell is completely  
1177 degraded during swarmer-stalked cell transition (G1) via DNA-facilitated proteolysis.  
1178 The transcription and translation of CcrM are repressed in early S phase and re-activated  
1179 in late S phase. Although CcrM can be stabilized in early S phase, the protein abundance  
1180 reaches its lowest point due to repressed transcription and translation. In stalked cell  
1181 cycle, remaining CcrM inherited from pre-divisional cell is sequestered at the flagellated  
1182 cell pole, which allows the initiation of chromosome replication at the stalked pole. The  
1183 sequestration stabilizes CcrM during S phase by preventing physical contact with  
1184 protease Lon.

### 1185 **Supplementary figure legends**

#### 1186 **Figure S1. Conserved C-terminal motifs determine CcrM DNA binding activity,** 1187 **related to Figure 2.**

1188 (A) Sequence alignment of CcrM homologs from twelve divergent  $\alpha$ -proteobacterial  
1189 species reveals four conserved motifs at C-terminus. The conserved residues subjected to  
1190 mutation from each motif are highlighted.

1191 (B) Phase contrast micrographs of *ccrM* depletion strains complemented with CcrM,  
1192 CcrMD304A, CcrMS315A, CcrMW332A, CcrMD347A, CcrMR350A. Scale bar = 5  $\mu\text{m}$ .

1193 (C) Cell length analyses of strains in (A). Mean cell length ( $\mu\text{m}$ )  $\pm$  SEM: CcrM =  $3.10 \pm$   
1194  $0.08$  ( $n = 128$ ); CcrMD304A =  $2.71 \pm 0.05$  ( $n = 120$ ); CcrMS315A =  $7.66 \pm 0.54$  ( $n =$   
1195  $112$ ); CcrMW332A =  $9.57 \pm 0.59$  ( $n = 120$ ); CcrMD347A =  $2.78 \pm 0.06$  ( $n = 133$ );  
1196 CcrMR350A =  $2.92 \pm 0.07$  ( $n = 152$ ). \*\*\*\* indicates  $P < 0.0001$  by one-way ANOVA.

1197 (D) Spot dilutions of strains in (A). Cells in exponential phase were diluted to an OD600  
1198 of 0.03, serially diluted and spotted onto the same PYE agar plate and incubated at  $30^\circ\text{C}$   
1199 for 2 days before photography.

1200 (E) EMSA showing abolished DNA binding activity caused by mutation at S315A on  
1201 CcrM. See Methods for experimental details.

1202 **Figure S2. Verification of Lon DNA-binding and proteolytic activities, related to**  
1203 **Figure 3.**

1204 (A) EMSA showing the effect of alanine substitutions at S674 and  
1205 K301/K303/K305/K306 on Lon DNA binding activities. See Methods for experimental  
1206 details.

1207 (B) Phase contrast and epifluorescence images showing cell morphology and Lon  
1208 distribution. Wild-type cells expressing chromosomal YFP-Lon or Lon-YFP under the  
1209 control of native promoter were grown in M2G to exponential phase and imaged. Scale  
1210 bar =  $10\ \mu\text{m}$ .

1211 **Figure S3. Binding of CcrM to DNA is irrelevant to DNA methylation states, related**  
1212 **to Figure 4.**

1213 (A) Schematic view of restriction sites on Probe 1 and rationale of restriction digest-  
1214 based DNA methylation assay. *HinfI* is only able to cut unmethylated GANTC site (blue).  
1215 *HphI* cuts GGTGA(N)<sub>8</sub> that overlapped with a half of GANTC site (brown). Adenine  
1216 methylated GGTGA<sub>m</sub>(N)<sub>8</sub> is resistant to *HphI* digestion.

1217 (B) Agarose gels showing the verification of DNA methylation states by restriction digest  
1218 analyses with *HinfI* and *HphI*. Two DNA fragments are expected for *HinfI* digestion

1219 (C) EMSA showing CcrM and Lon binding to unmethylated, hemi-methylated and fully-  
1220 methylated Probe 1. See Methods for experimental details.



1221 (D) Quantitative immunoblots of CcrM levels in *Caulobacter* pre-divisional cell.  
1222 Immunoblots were performed following SDS-PAGE of different concentrations of  
1223 purified CcrM and a *Caulobacter* pre-divisional cell lysate collected at 120 mps. The  
1224 intracellular concentration of CcrM was  $1090 \pm 135$  nM or  $\sim 600 \pm 150$  CcrM monomers  
1225 per cell.

1226 **Figure S4. DNA plays an adaptor role in CcrM proteolysis by Lon, related to Figure**  
1227 **5.**

1228 (A) *In vitro* degradation assays showing the degradation of  $\beta$ -casein by Lon in the  
1229 presence and absence of DNA.  $\beta$ -casein (1  $\mu$ M) was incubated with Lon<sub>6</sub> (0.2  $\mu$ M) in the  
1230 absence or presence of Probe 1 (10 nM). Creatine kinase is part of the ATP regeneration  
1231 system.

1232 (B) *In vitro* degradation assays showing the degradation of  $\beta$ -casein by LonQM.  $\beta$ -casein  
1233 (1  $\mu$ M) was incubated with LonQM<sub>6</sub> (0.2  $\mu$ M) in the absence or presence of ATP (4 mM).  
1234 Creatine kinase is part of the ATP regeneration system.

1235 **Figure S5. Identification of the roles of known polar localized proteins in CcrM**  
1236 **sequestration, related to Figure 6.**

1237 (A) Bacterial two-hybrid assays showing the negative interaction of CcrM to polar  
1238 localized proteins (PleC, DivL, PodJ, TipN, and TipF). - / - and + / + indicate a negative  
1239 and a positive control, respectively. Red colonies indicate a positive interaction. Cells  
1240 were grown at 30 °C for 2 days before photography.

1241 (B) Overlaid phase contrast and epifluorescence images showing CcrM polar  
1242 sequestration in cells depleting several known polar localized proteins and protease  
1243 regulator PerP. CcrM polar sequestration does not depend on the presence of DivL, PopZ,  
1244 PodJ, MopJ, and PerP. Deletion of SpmX serves as a negative control.

1245 **Figure S6. *In vivo* stability of CcrM, related to Figure 7.**

1246 (A) *In vivo* degradation assays showing CcrM stability in a mixed population. Stabilities  
1247 of YFP chimeric proteins in  $\Delta lon$  (- lon) cells are shown for comparison. Cells were  
1248 grown in PYE with 0.3% xylose to exponential phase and treated with antibiotics for  
1249 protein synthesis shut-off assays. Protein levels were monitored by immunoblot using

1250 anti-GFP antibody (top). Band intensities were quantified (bottom) and error bars  
1251 represent SDs ( $n = 3$ ).

1252 (B) *In vivo* degradation assays showing CcrM stabilities at 120 mps and 160 mps in wild-  
1253 type. CcrM stabilities in  $\Delta lon$  cells are shown for comparison. Cells were harvested at  
1254 160 mps or 120 mps and treated with antibiotics to shut-off protein synthesis. Protein  
1255 levels were monitored by immunoblot using anti-CcrM antibody (top). Band intensities  
1256 were quantified (bottom) and error bars represent SDs ( $n = 3$ ).

1257

Figure 1

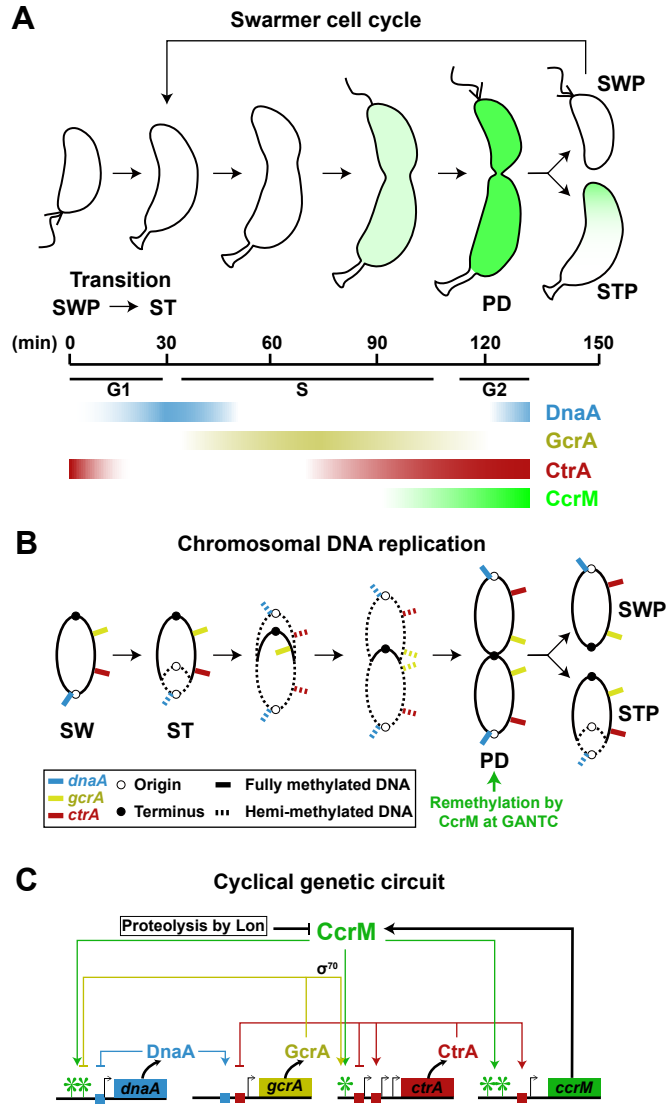

**Figure 2**

**A**

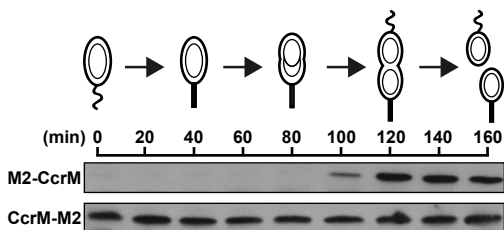

**B**

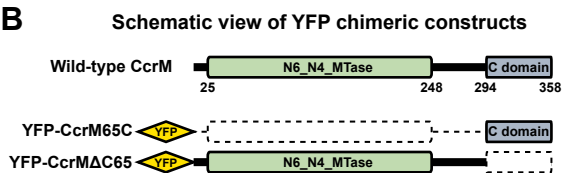

**C**

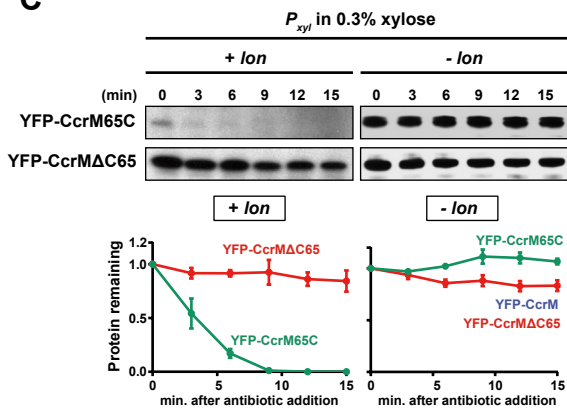

**D**

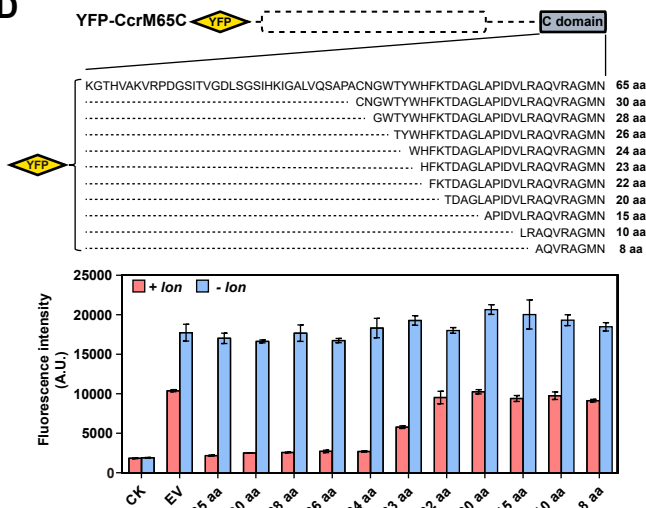

**E**

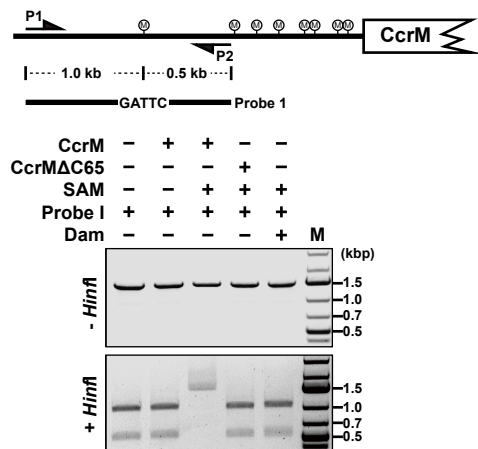

**Figure 3**

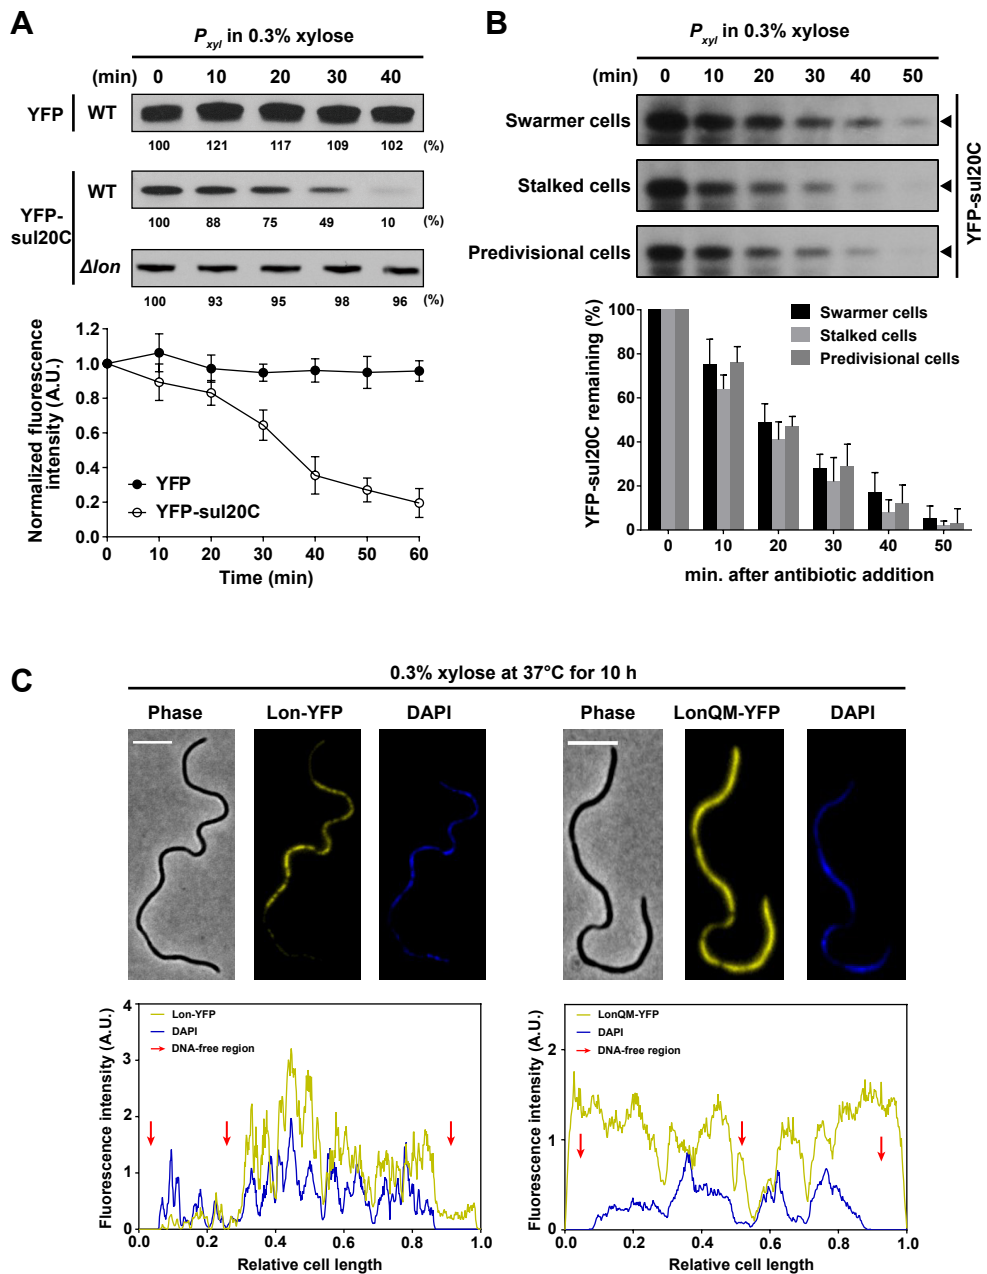

**Figure 4**

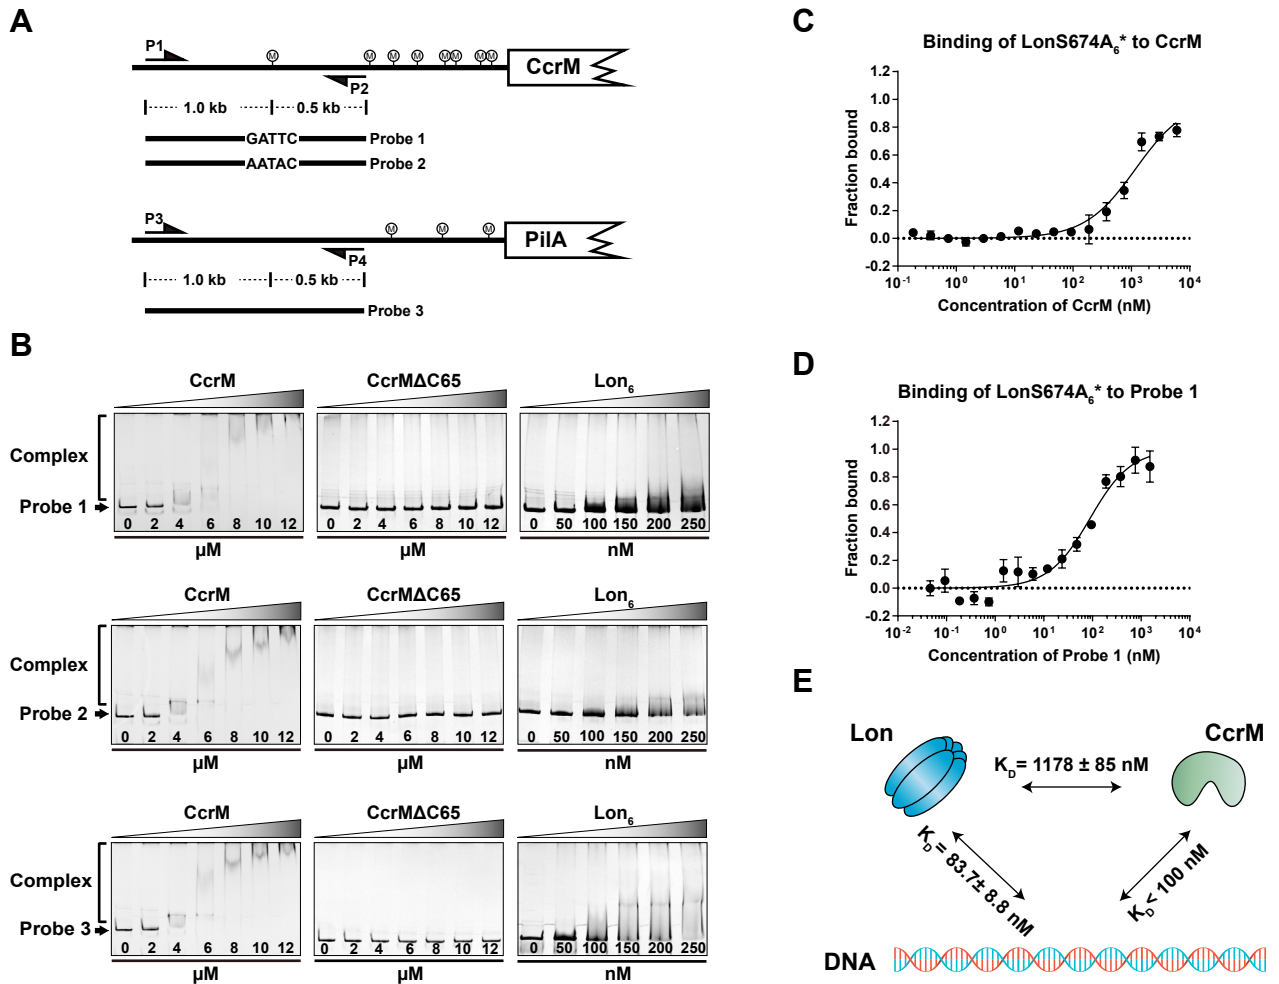

**Figure 5**

**A**

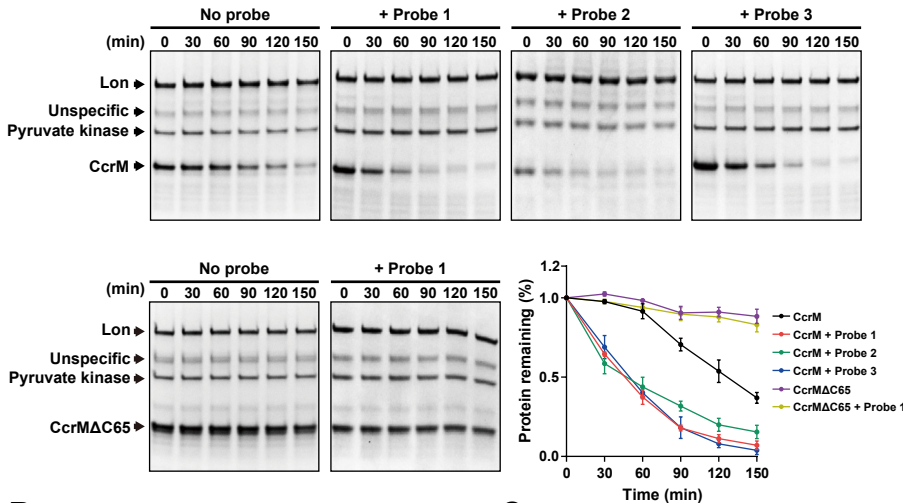

**B**

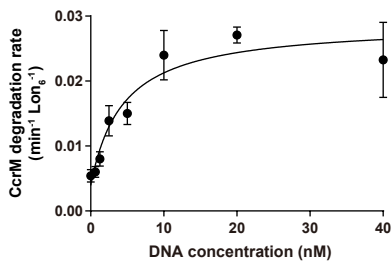

**C**

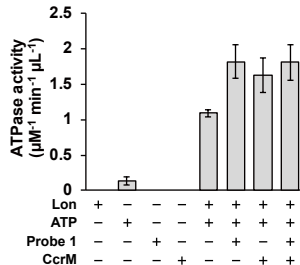

**E**

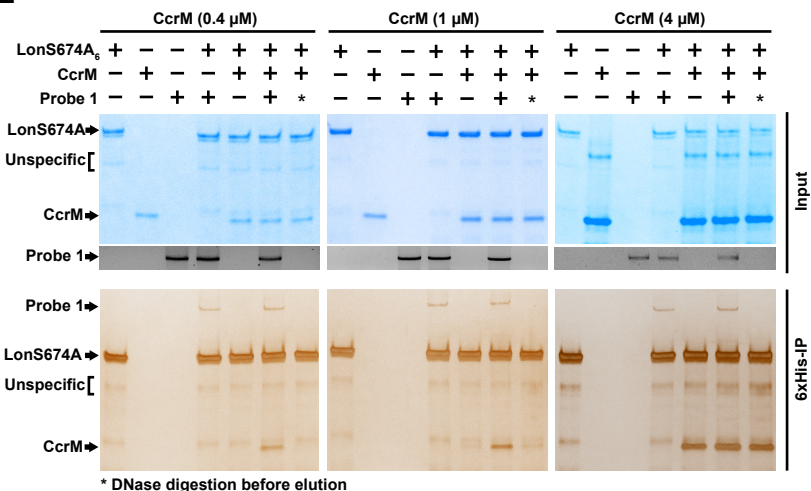

**D**

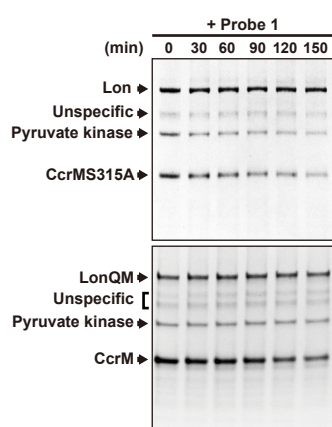

**F**

**DNA-facilitated CcrM proteolysis by Lon**

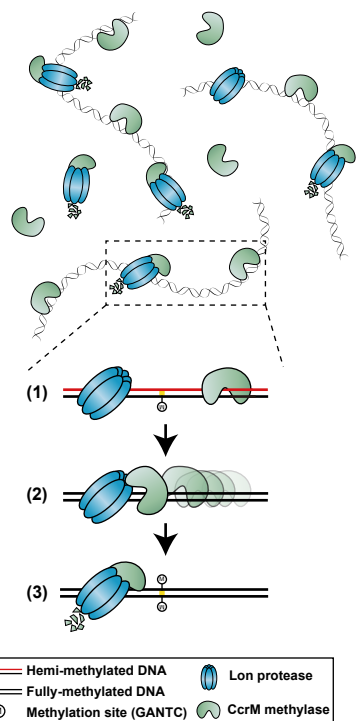



**Figure 6****A**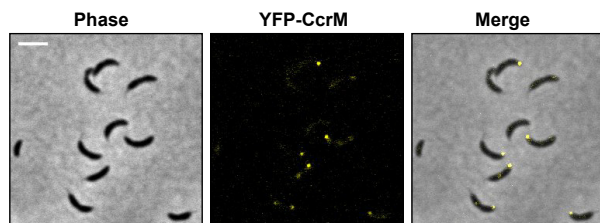**Distribution of YFP-CcrM localization in mixed population**

| Localization | No. of cells | Percentage (%) |
|--------------|--------------|----------------|
| Unipolar     | 131          | 29.50          |
| Bipolar      | 11           | 2.48           |
| Mid-cell     | 19           | 4.28           |
| Multi-foci   | 17           | 3.83           |
| Diffuse      | 84           | 18.92          |
| No signal    | 182          | 40.99          |
| <b>Total</b> | <b>444</b>   | <b>100</b>     |

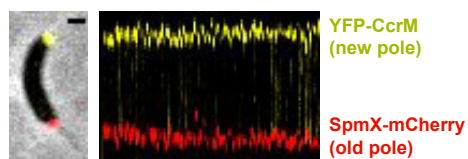

n = 103

**B**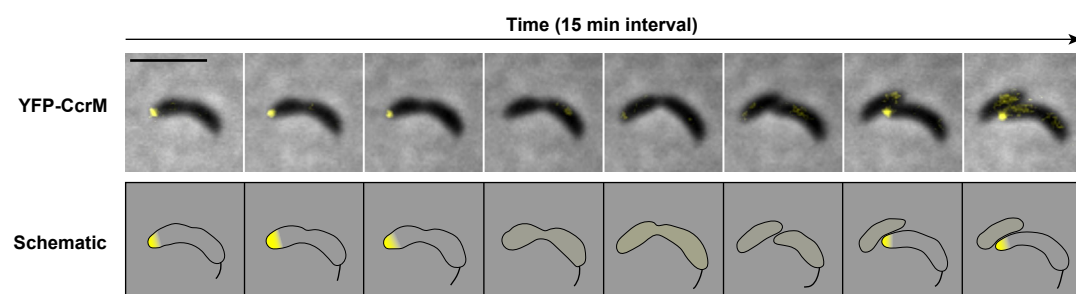**C**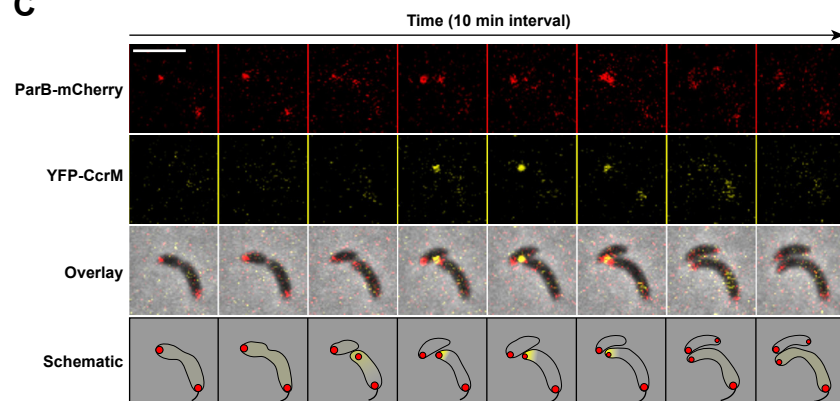**D**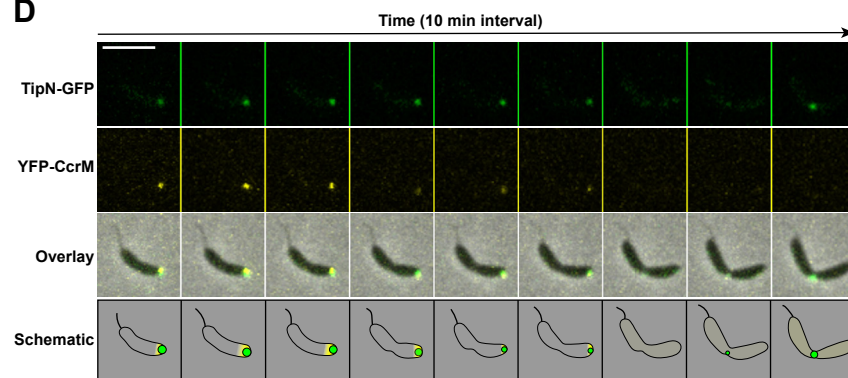**E**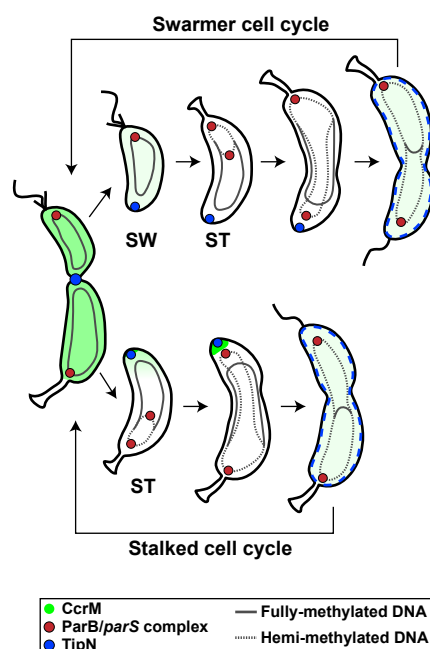

**Figure 7**

**A**

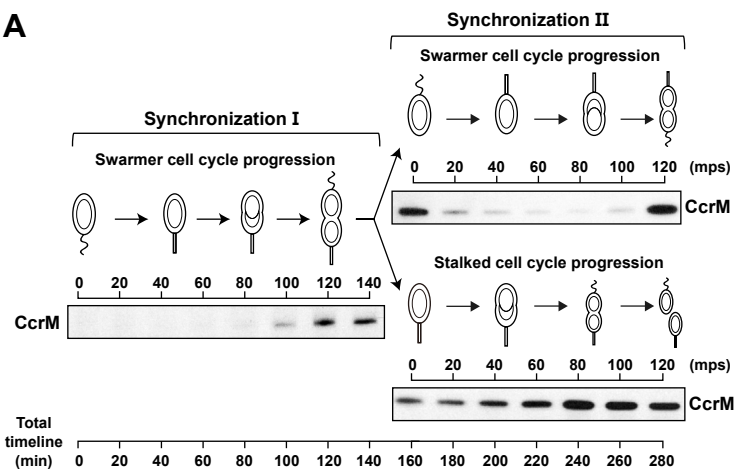

**B**

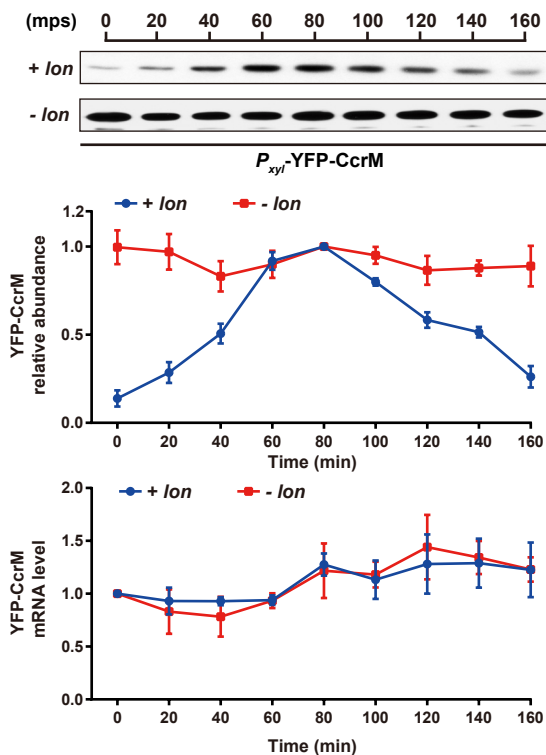

**C**

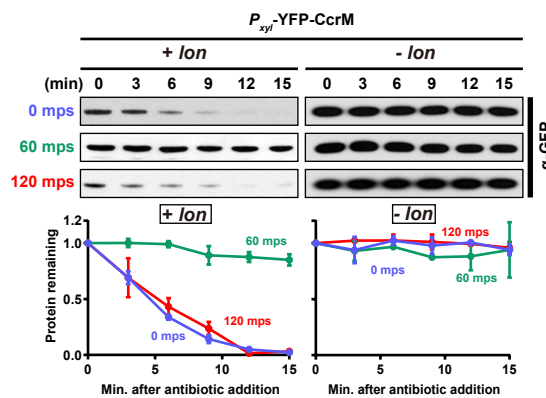

**D**

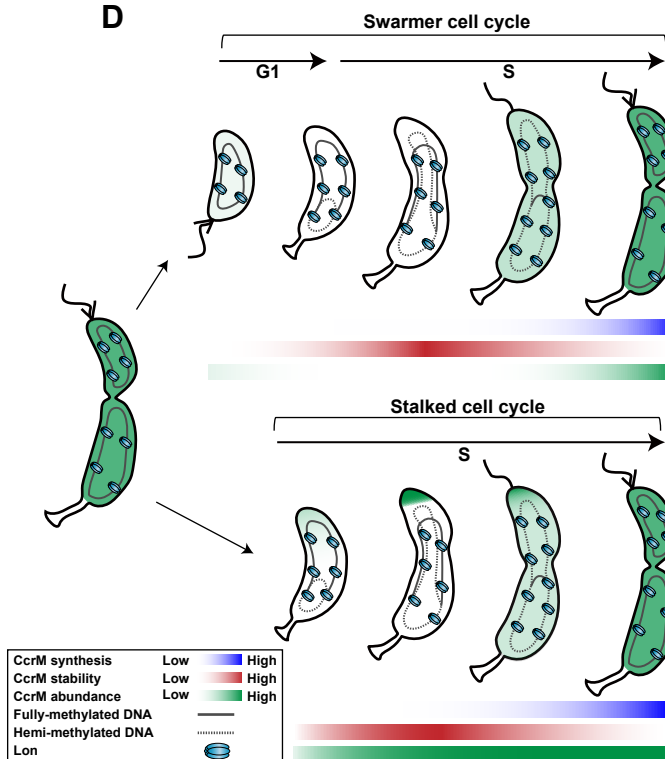

Source: http://biorxiv.org/content/10.1101/293738v1.full.pdf
